# Supplementary material
Source: MDPI journal article supplement (https://www.mdpi.com/1996-1073/14/18/5797)
Supplement: s1 [file s1]

# ***Hierarchical auto-ignition and structure-reactivity trends of C<sub>2</sub>–C<sub>4</sub> 1-Alkenes***

Wuchuan Sun<sup>1</sup>, Yingjia Zhang<sup>1\*</sup>, Yang Li<sup>2</sup>, Zuohua Huang<sup>1</sup>

- 1. State Key Laboratory of Multiphase Flow in Power Engineering, Xi'an Jiaotong University, Xi'an 710049, China*
- 2. Science and Technology on Combustion, Internal Flow and Thermostructure Laboratory, School of Astronautics, Northwestern Polytechnical University, Xi'an 710072, People's Republic of China*

## Supplemental Information

### 1. Mechanism performance for ethylene

#### 1.1 Shock tube ignition delay times of ethylene

##### 1.1.1 Hidaka et al. experimental data[1]

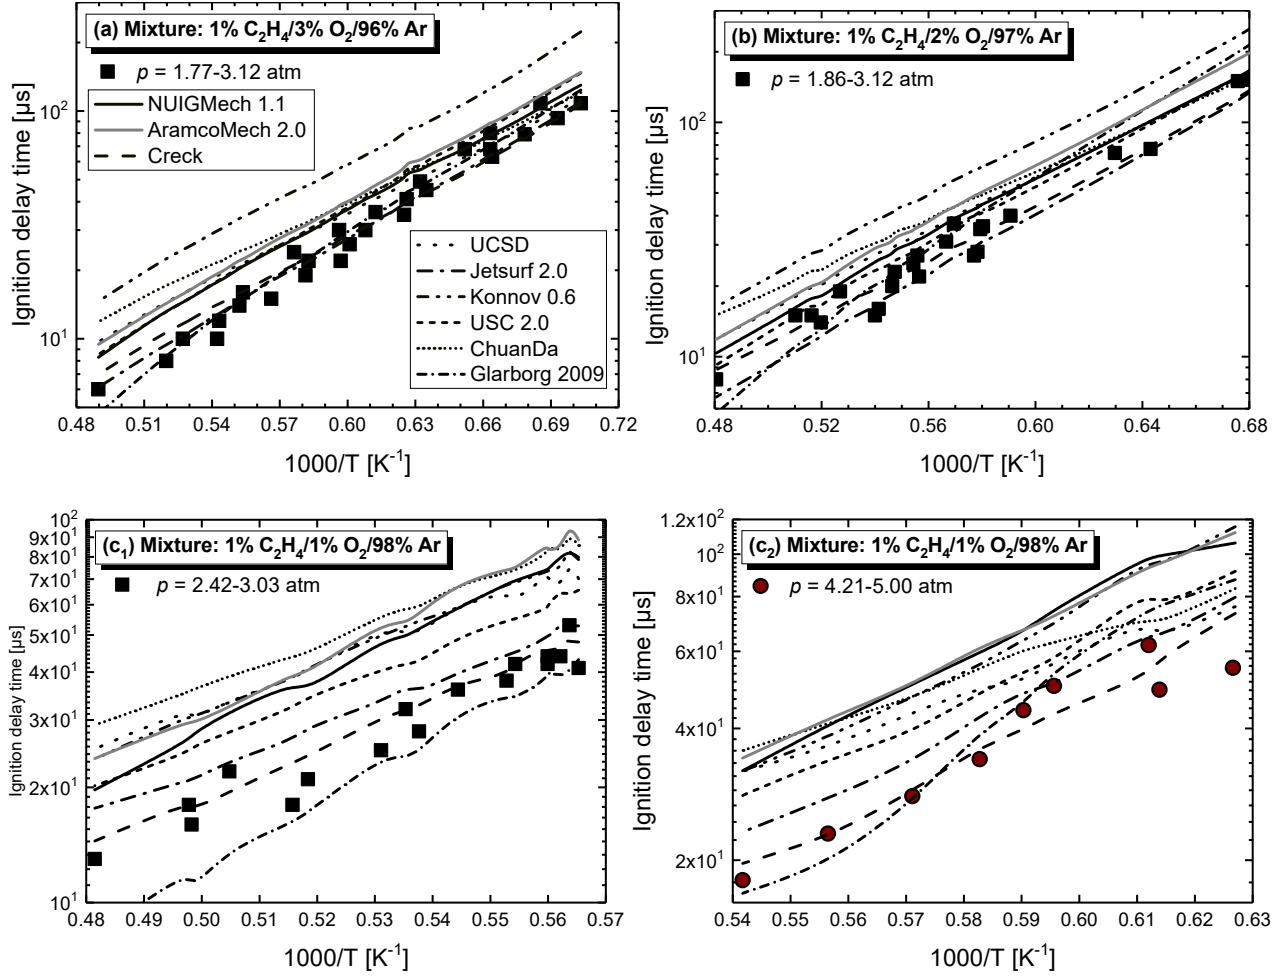

Figure S1: Shock tube ignition delay times for ethylene mixtures. Symbols represent experimental data; lines denote model predictions with the selected mechanisms.

### 1.1.2 Brown and Thomas experimental data[2]

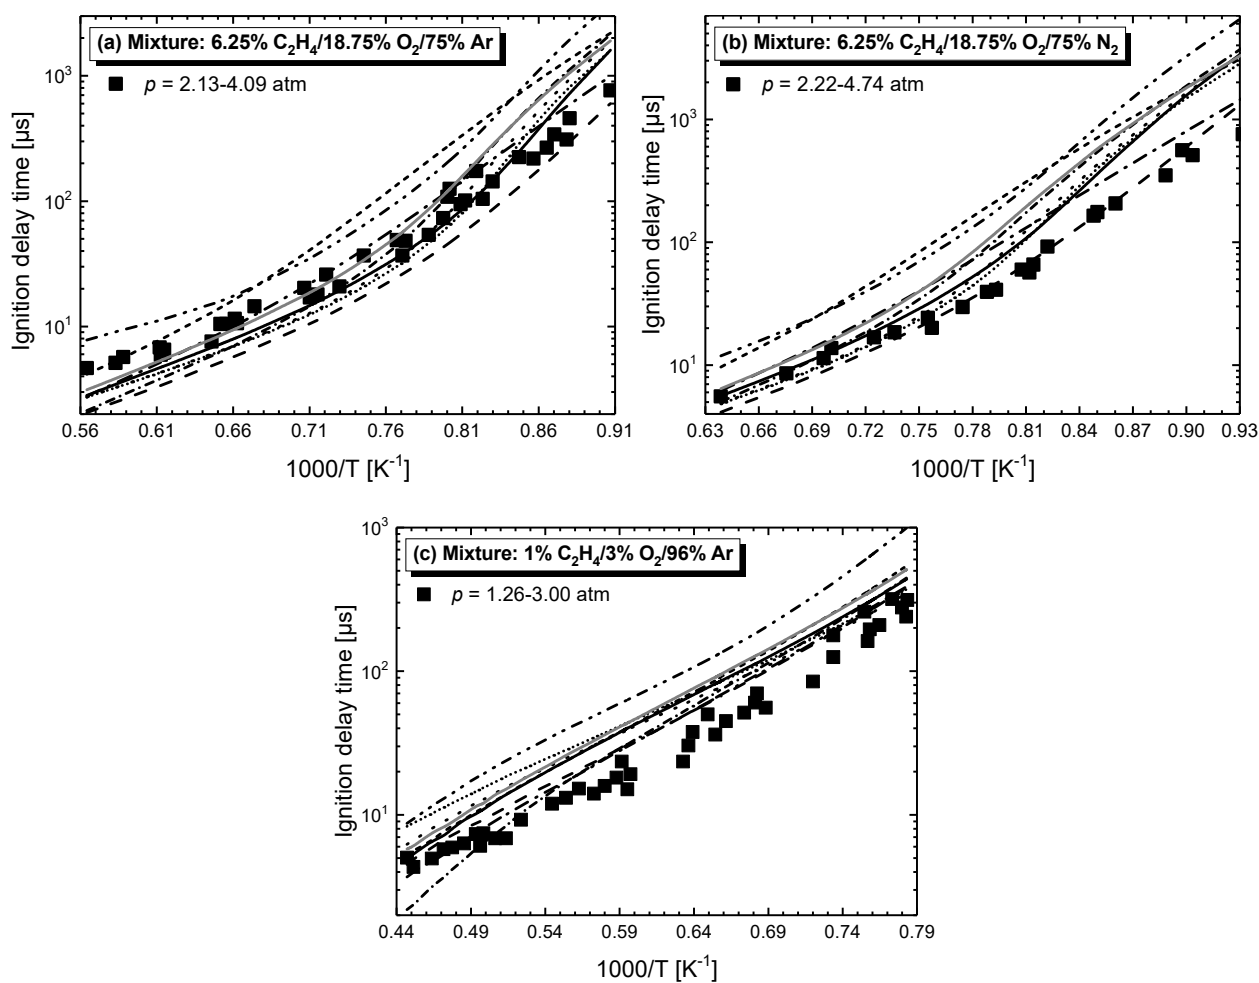

Figure S2: Shock tube ignition delay times for ethylene mixtures. Symbols represent experimental data; lines denote model predictions with the selected mechanisms.

### 1.1.3 Collect and Spadaccini experimental data[3]

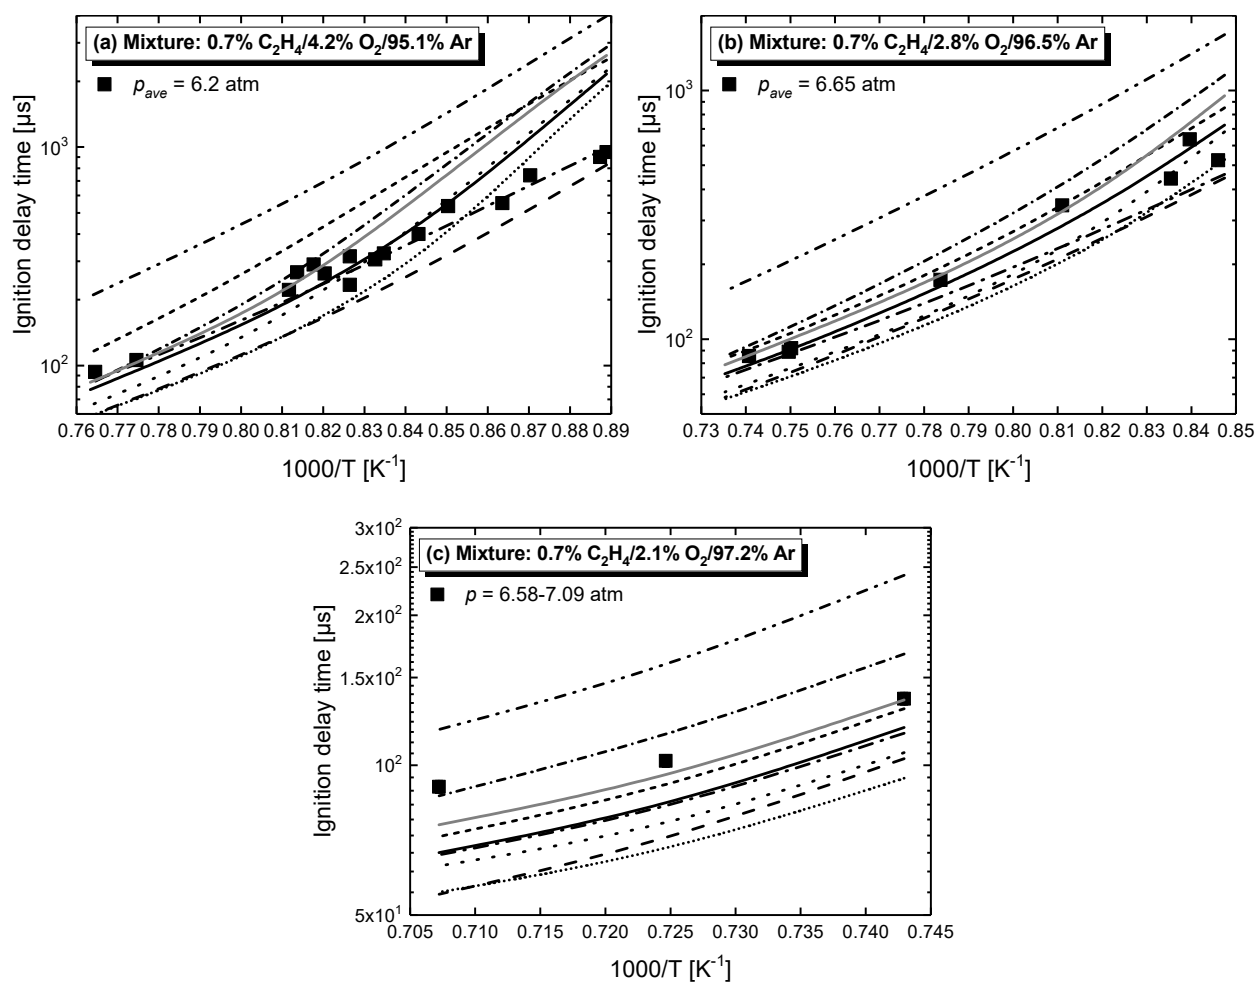

Figure S3: Shock tube ignition delay times for ethylene mixtures. Symbols represent experimental data; lines denote model predictions with the selected mechanisms.

#### 1.1.4 Horning experimental data (Stanford)[4]

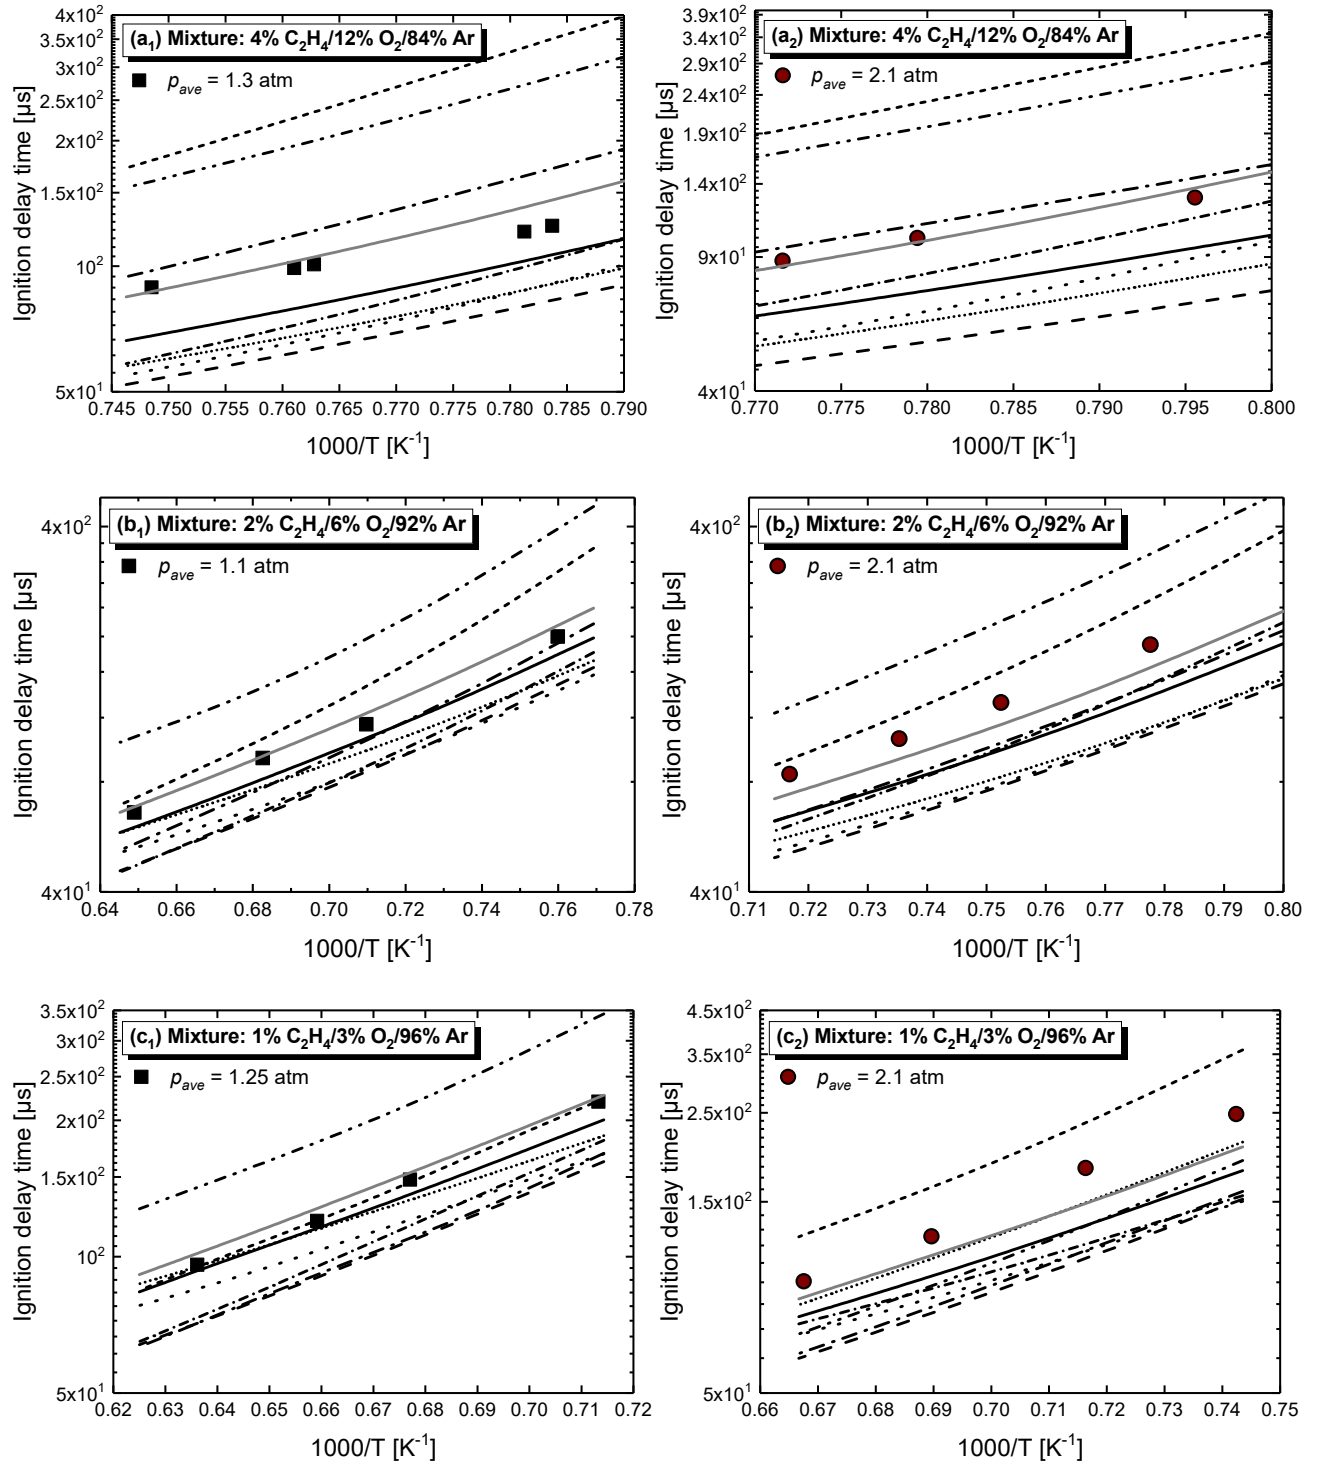

Figure S4: Shock tube ignition delay times for ethylene mixtures. Symbols represent experimental data; lines denote model predictions with the selected mechanisms.

### 1.1.5 Kalitan et al. experimental data[5]

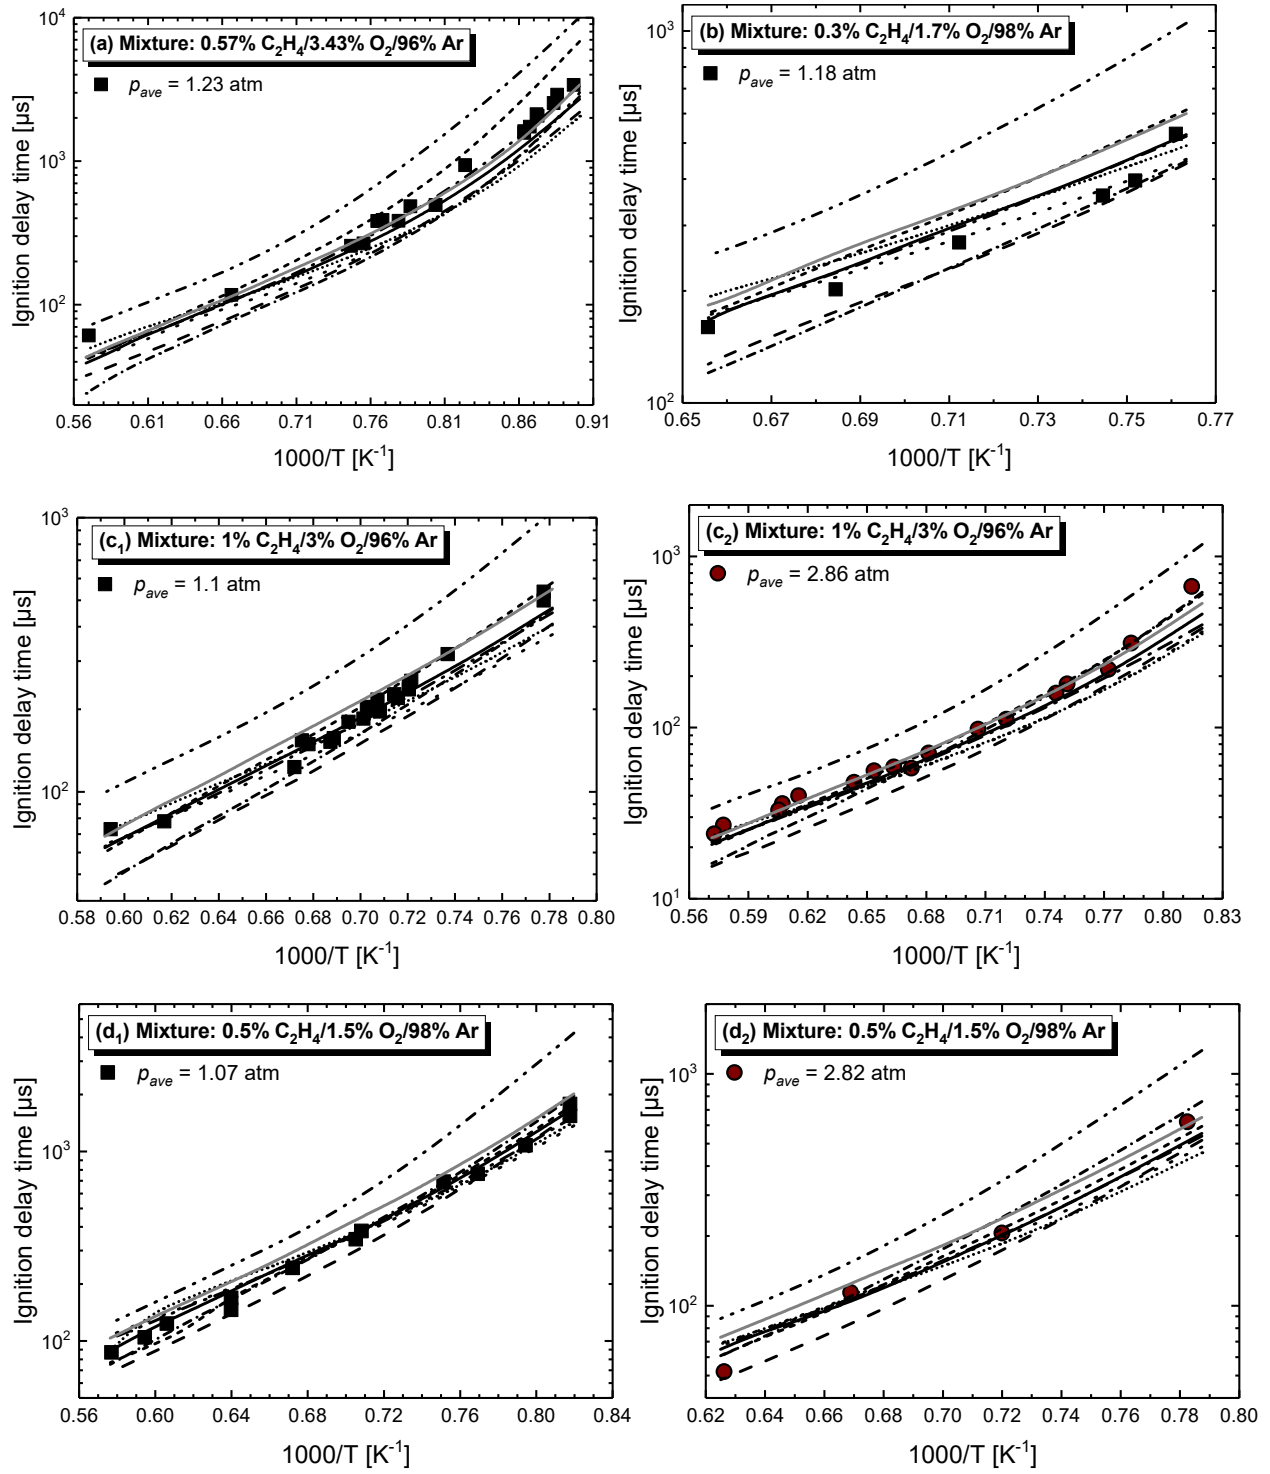

Figure S5: Shock tube ignition delay times for ethylene mixtures. Symbols represent experimental data; lines denote model predictions with the selected mechanisms.

1.1.6 Penyazkov et al. experimental data[6]

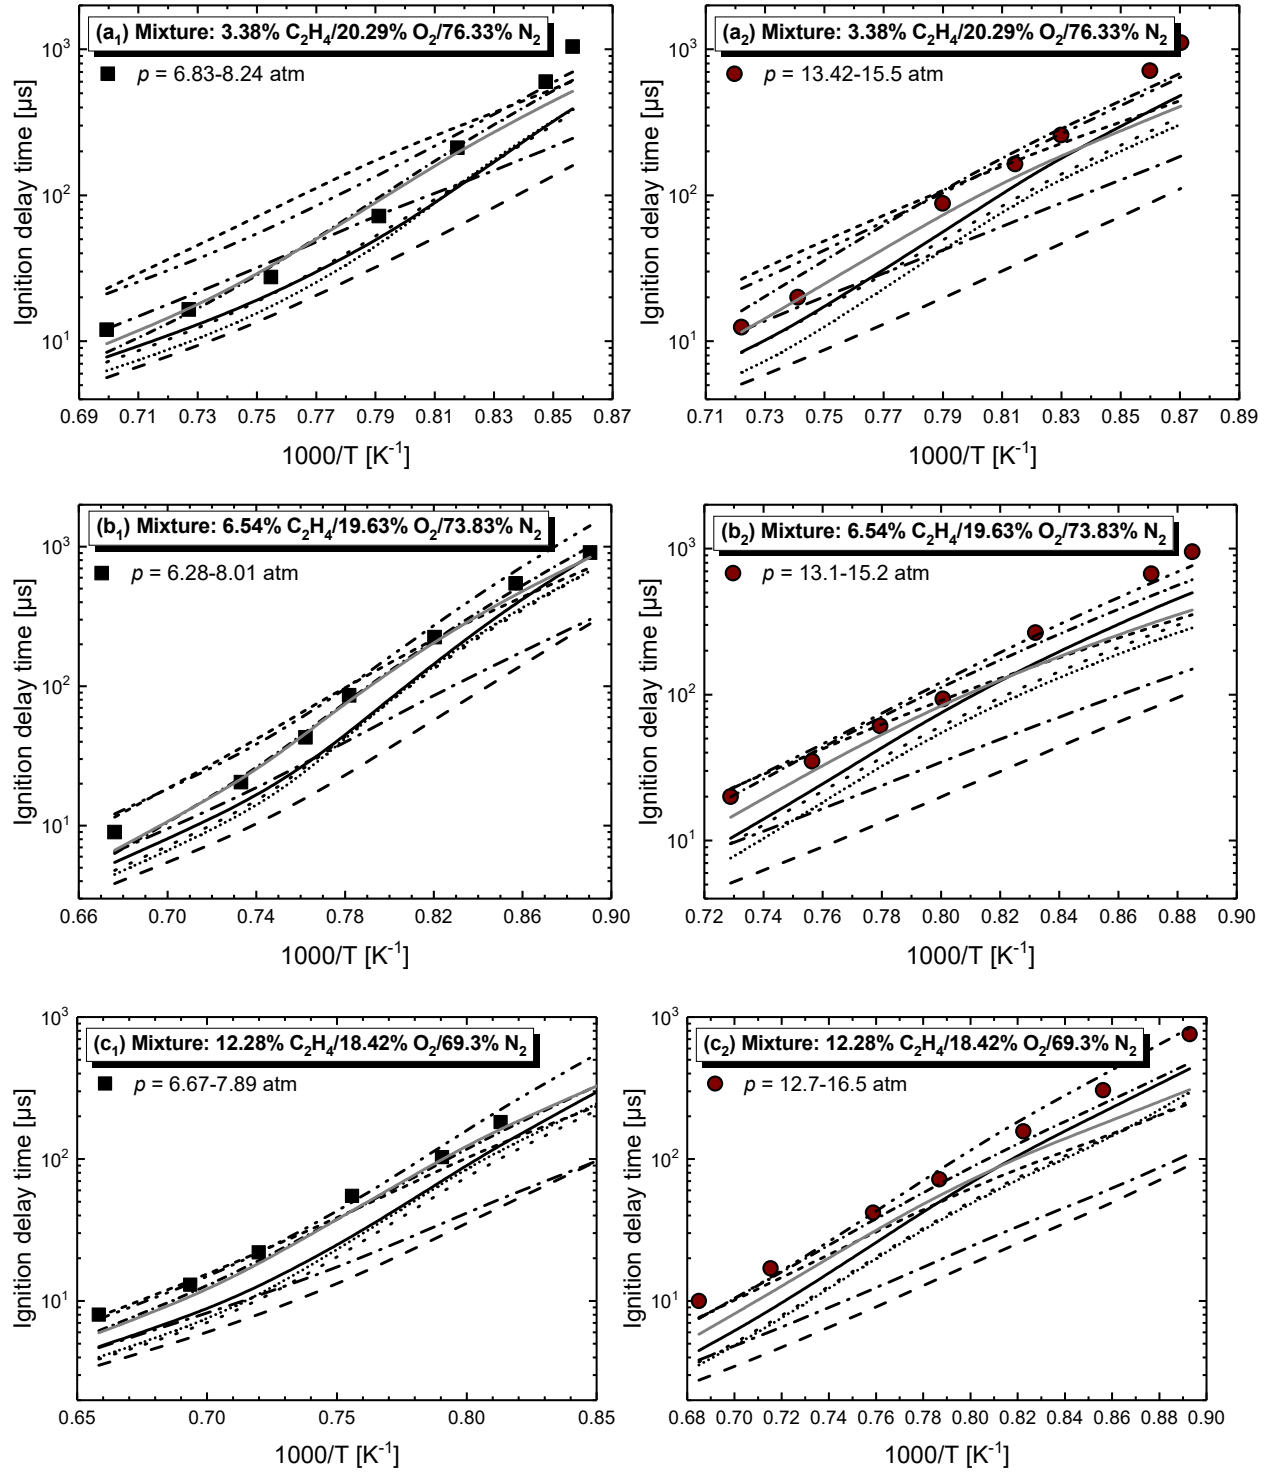

Figure S6: Shock tube ignition delay times for ethylene mixtures. Symbols represent experimental data; lines denote model predictions with the selected mechanisms.

1.1.7 Tereza et al. experimental data[7]

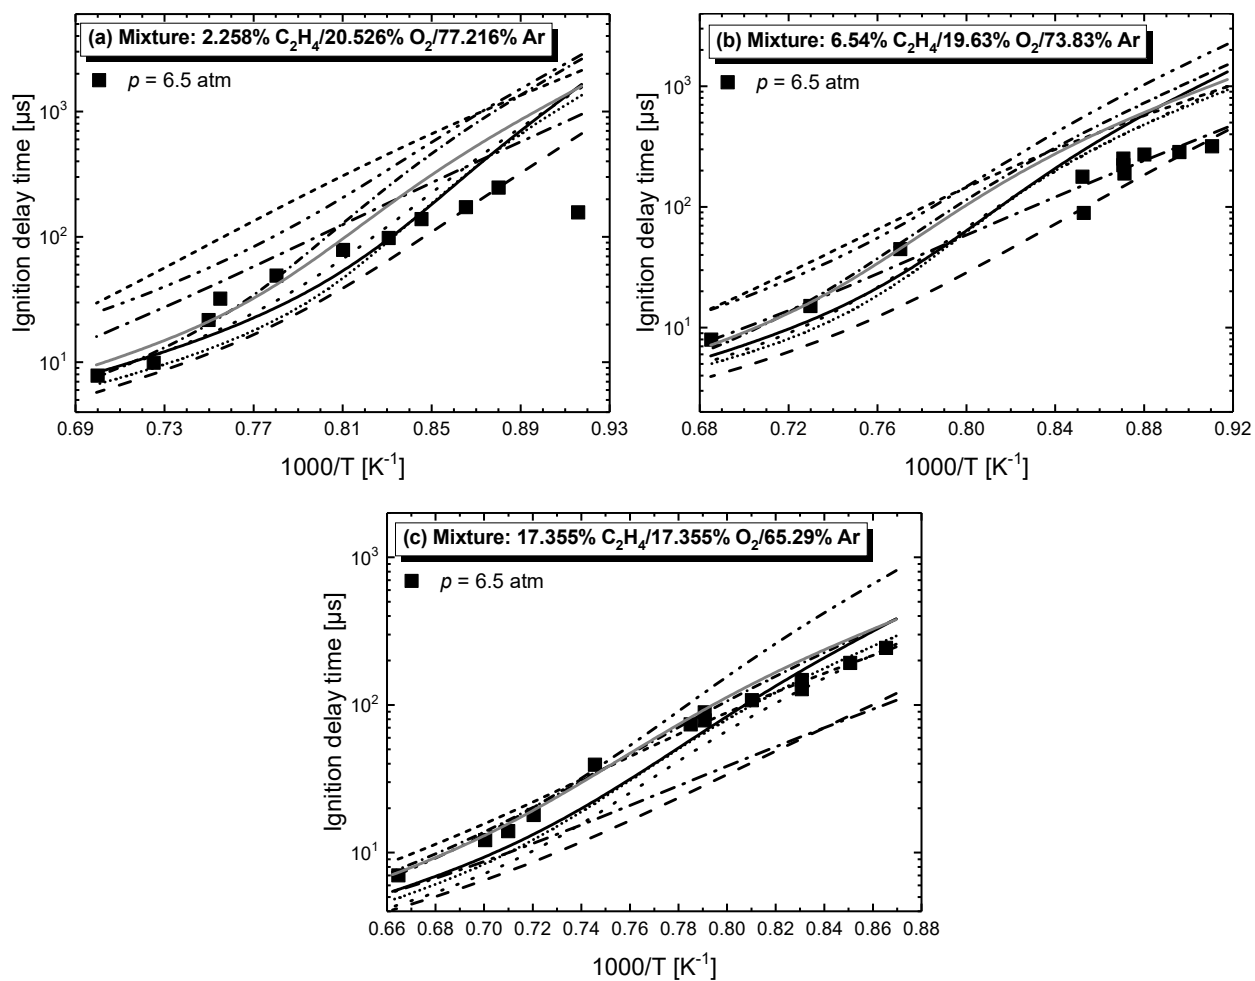

Figure S7: Shock tube ignition delay times for ethylene mixtures. Symbols represent experimental data; lines denote model predictions with the selected mechanisms.



### 1.1.8 Saxena et al. experimental data[8]

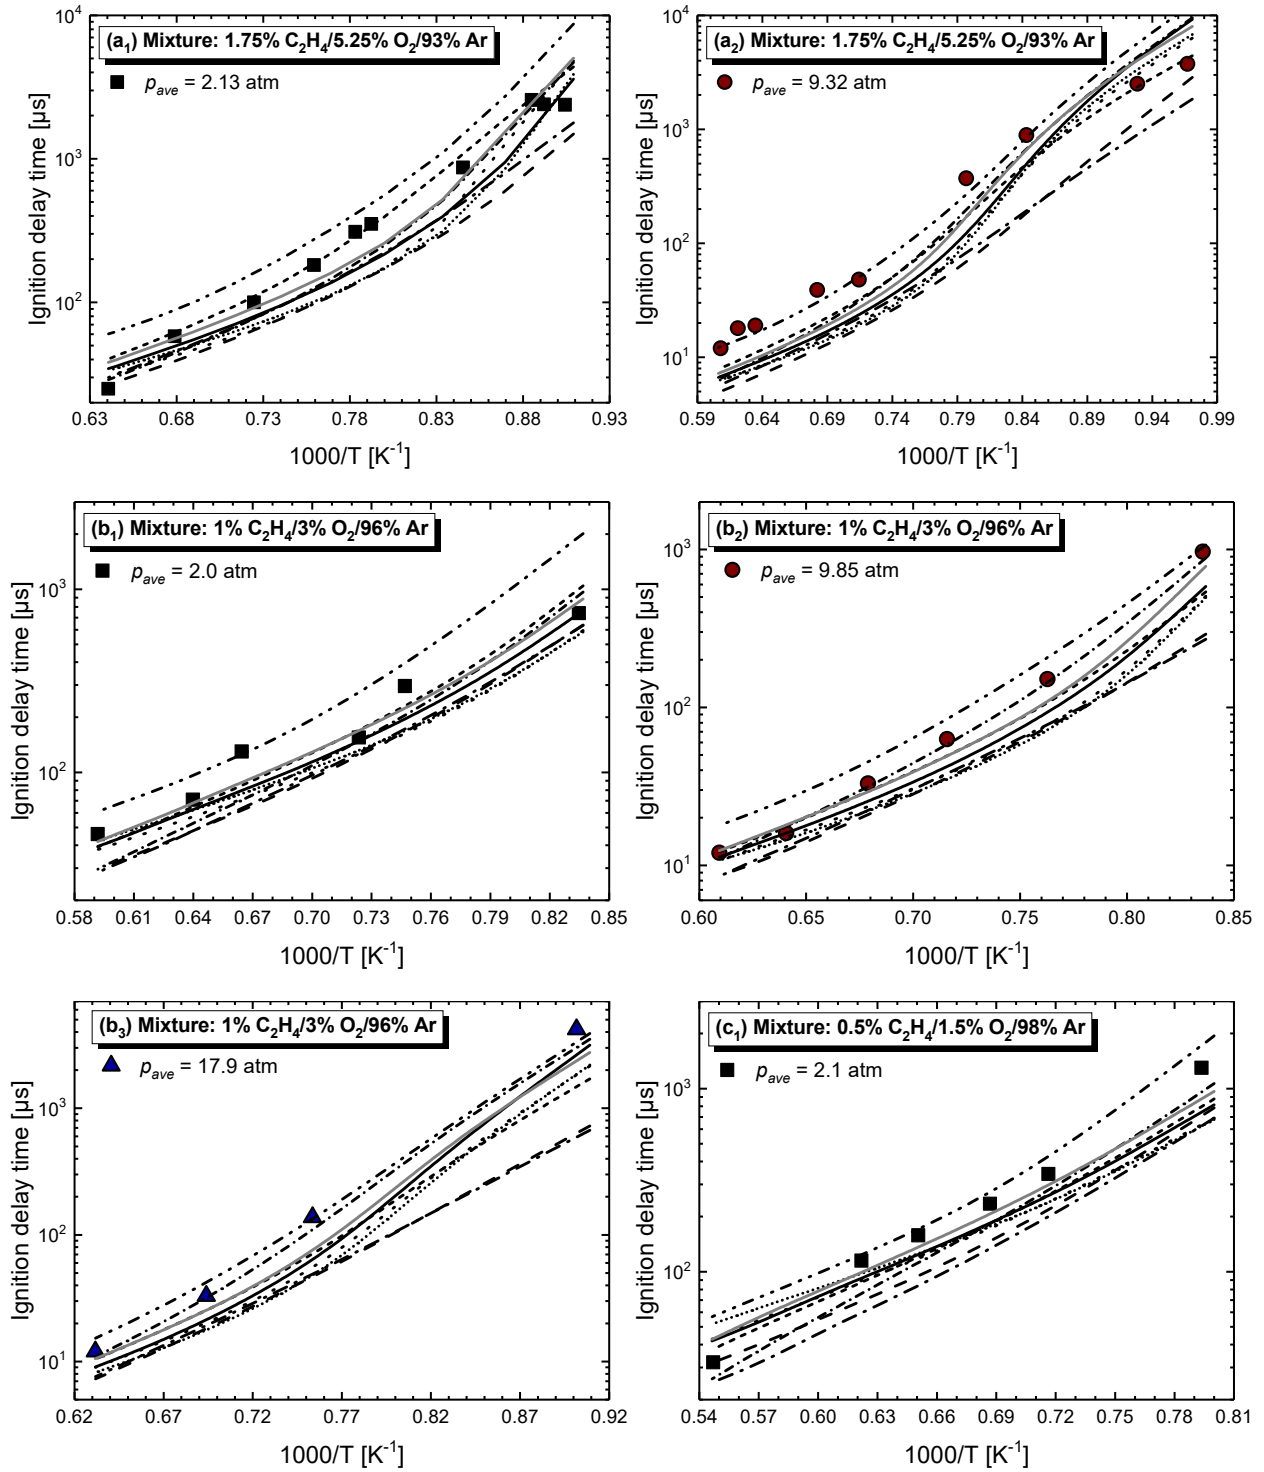

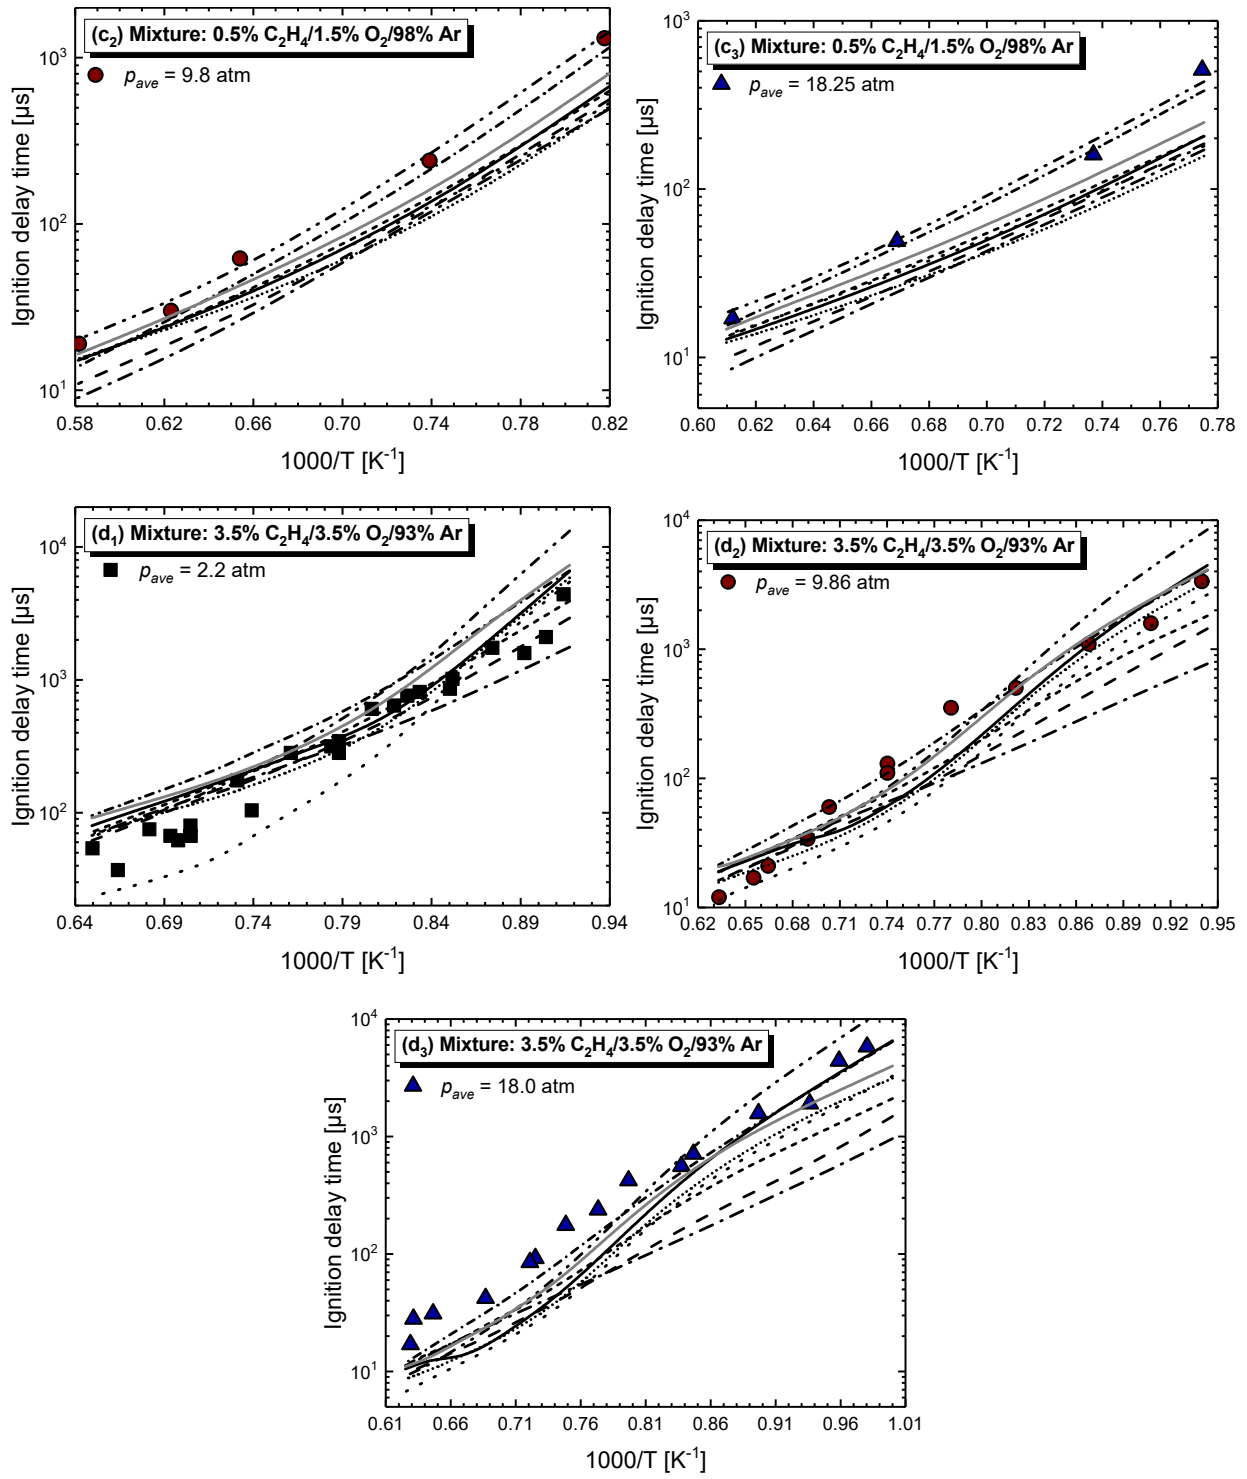

Figure S8: Shock tube ignition delay times for ethylene mixtures. Symbols represent experimental data; lines denote model predictions with the selected mechanisms.

1.1.9 Davidson et al. experimental data[9]

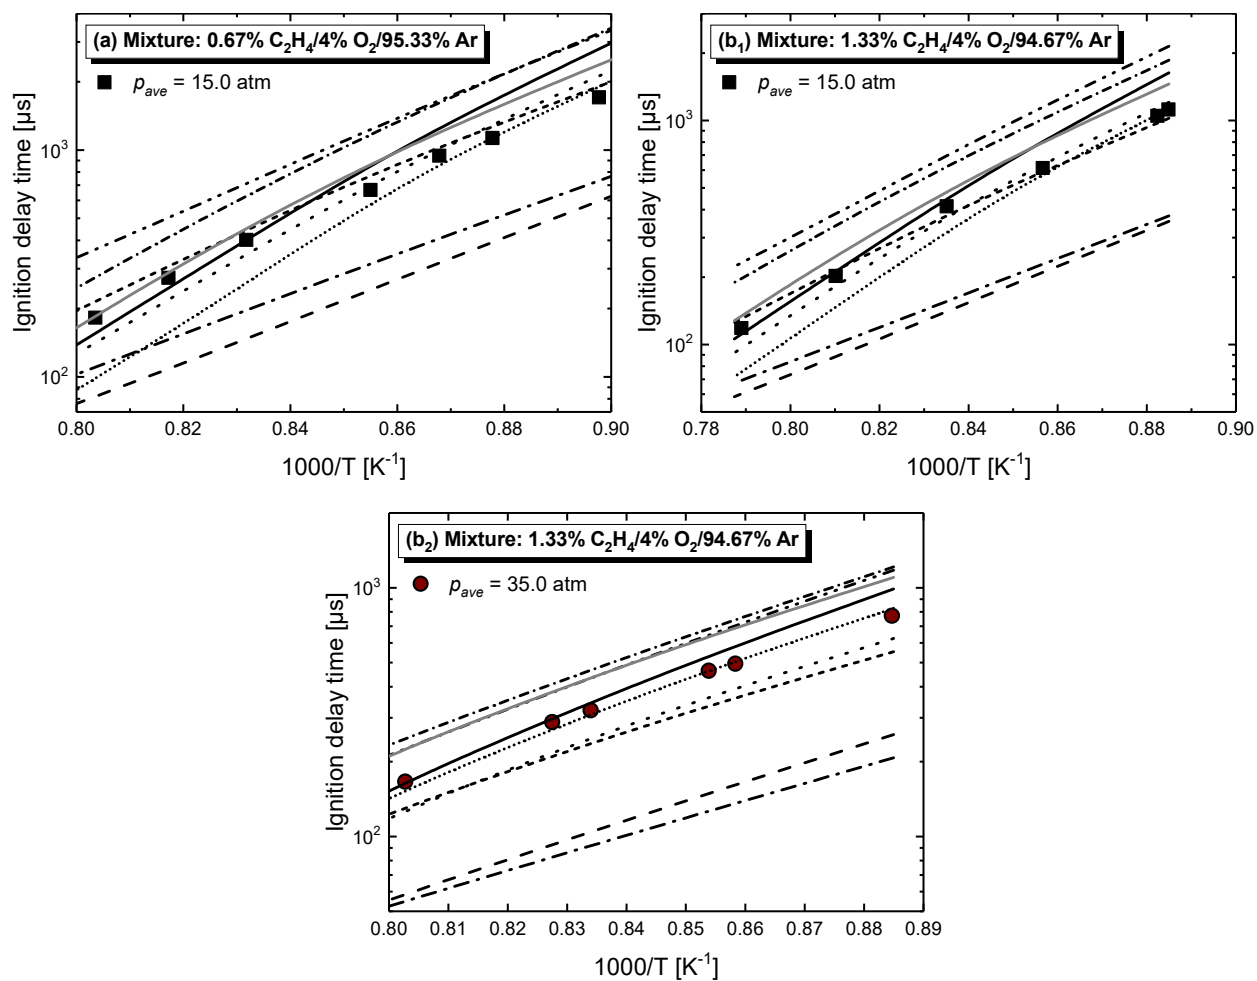

Figure S9: Shock tube ignition delay times for ethylene mixtures. Symbols represent experimental data; lines denote model predictions with the selected mechanisms.

1.1.10 Kopp et al. experimental data[10]

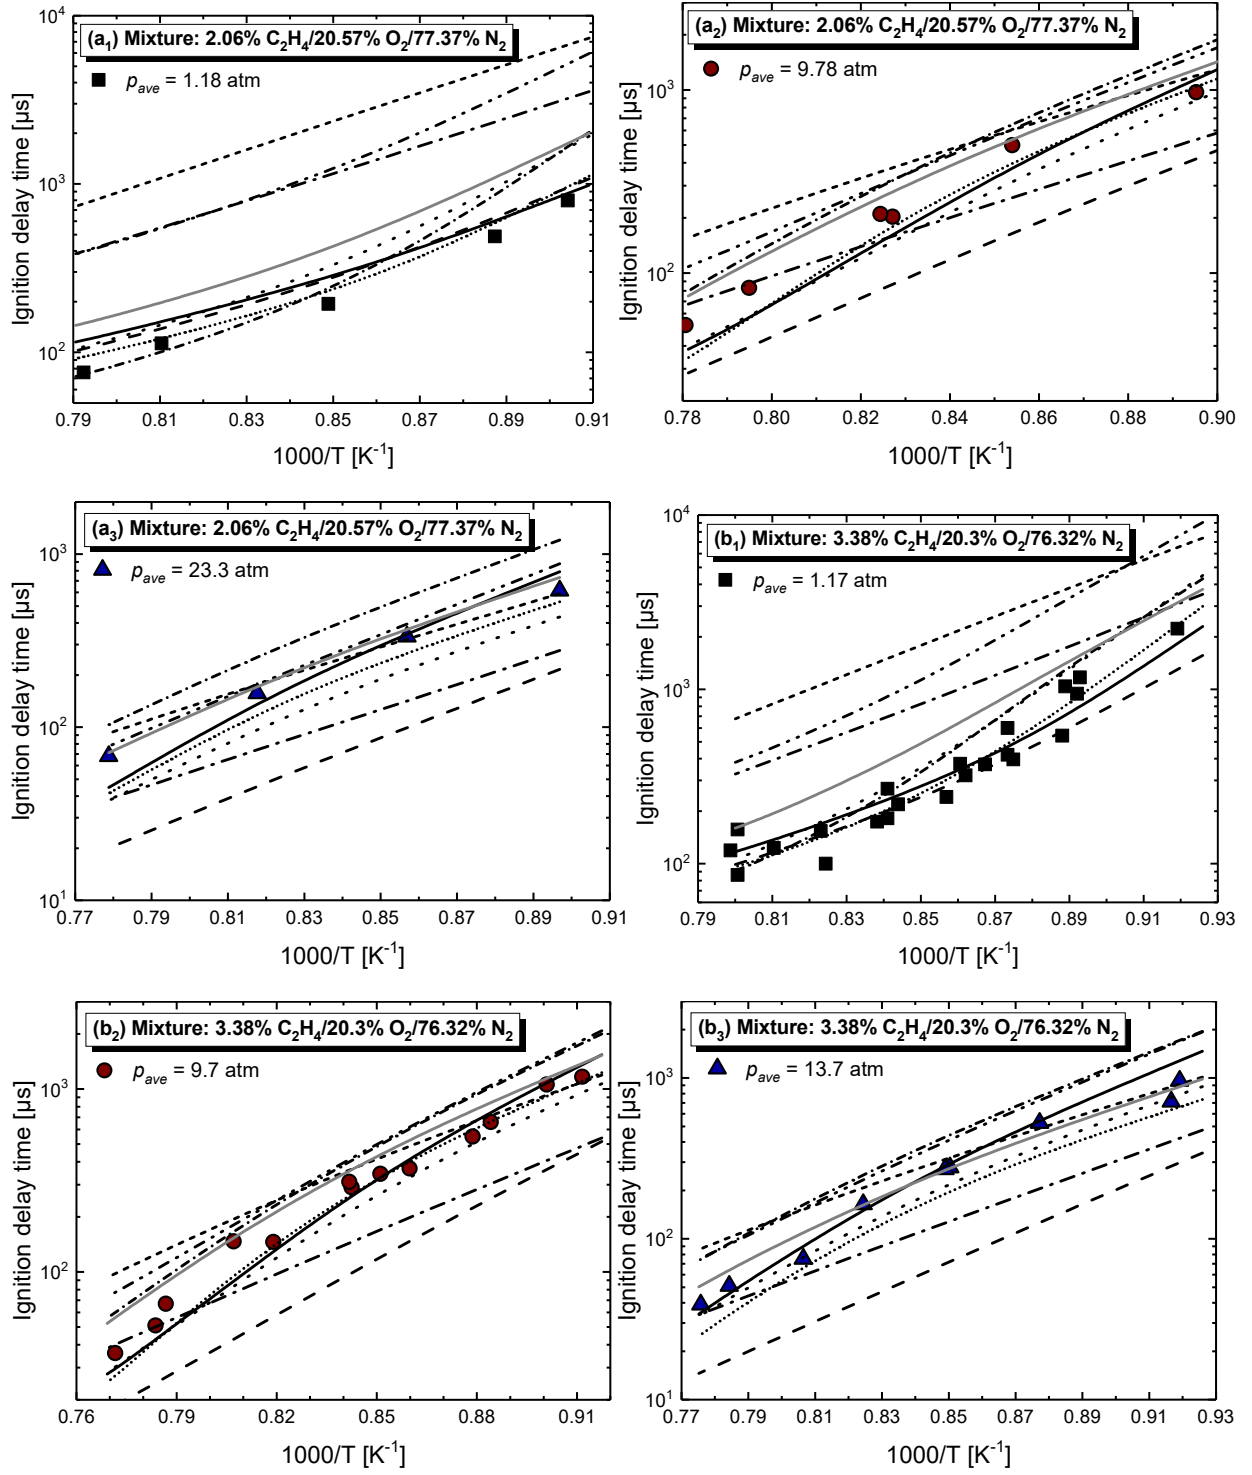

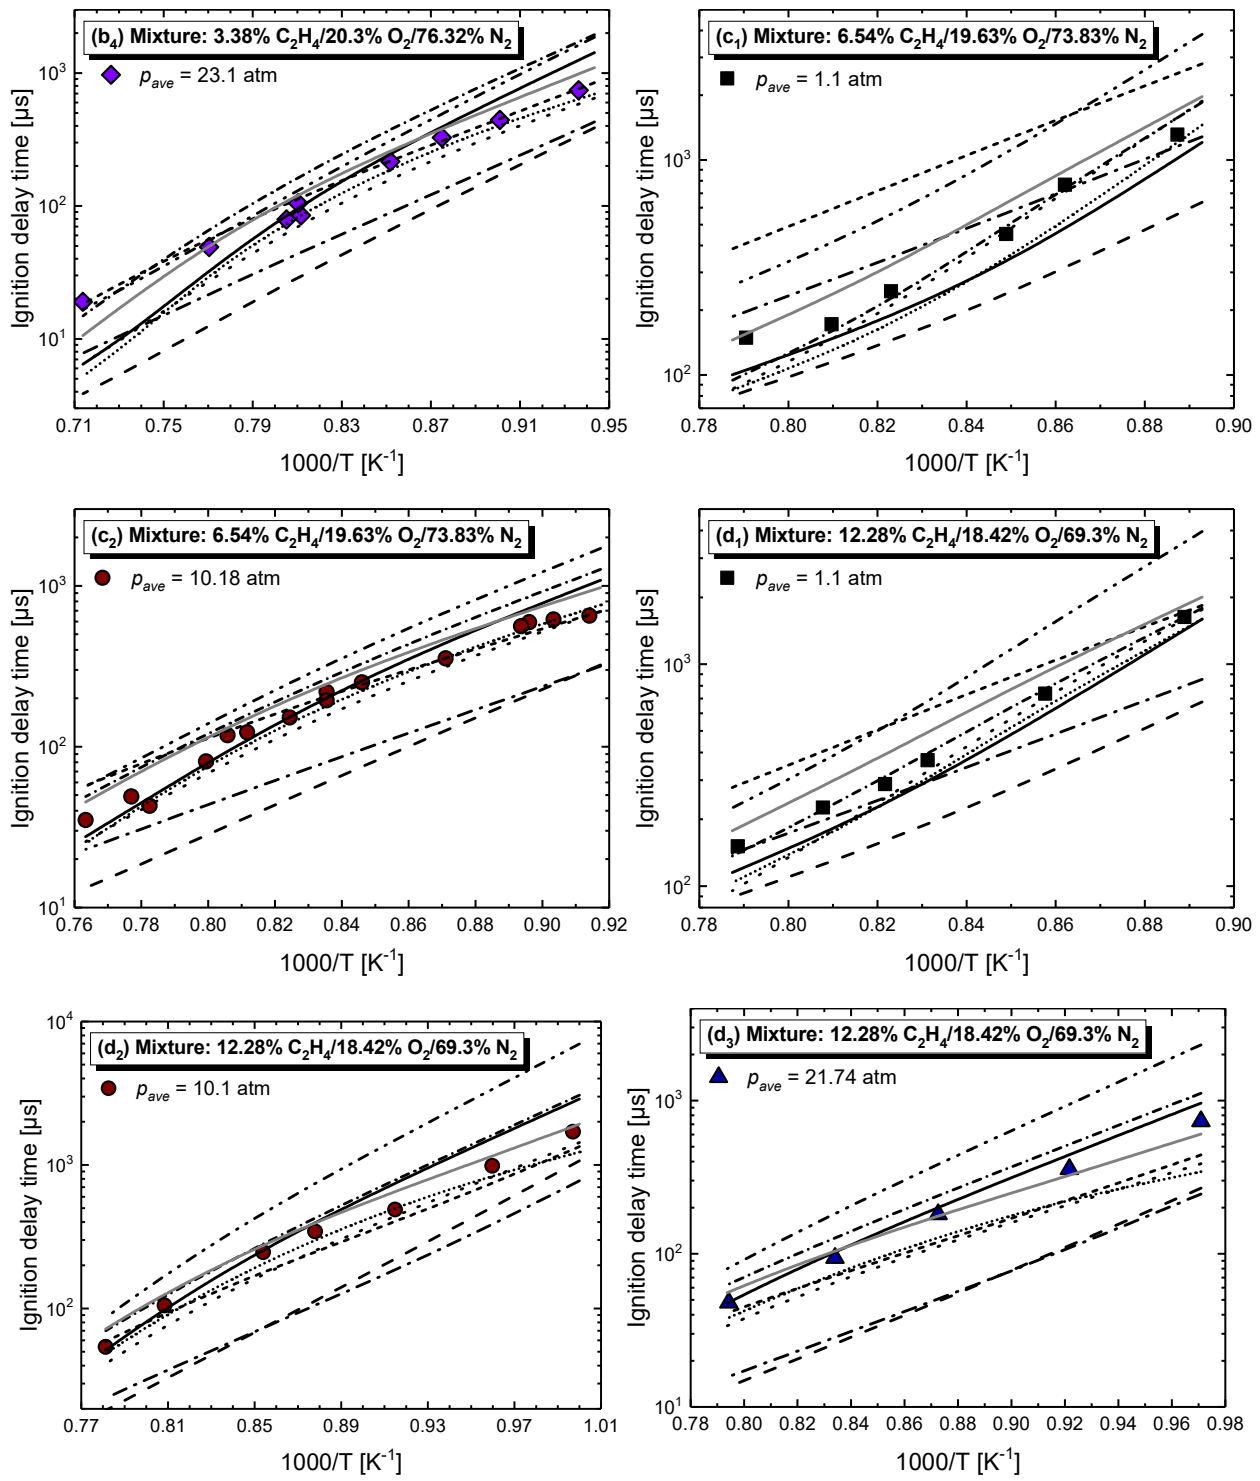

Figure S10: Shock tube ignition delay times for ethylene mixtures. Symbols represent experimental data; lines denote model predictions with the selected mechanisms.

1.1.11 Mathieu et al. experimental data[11]

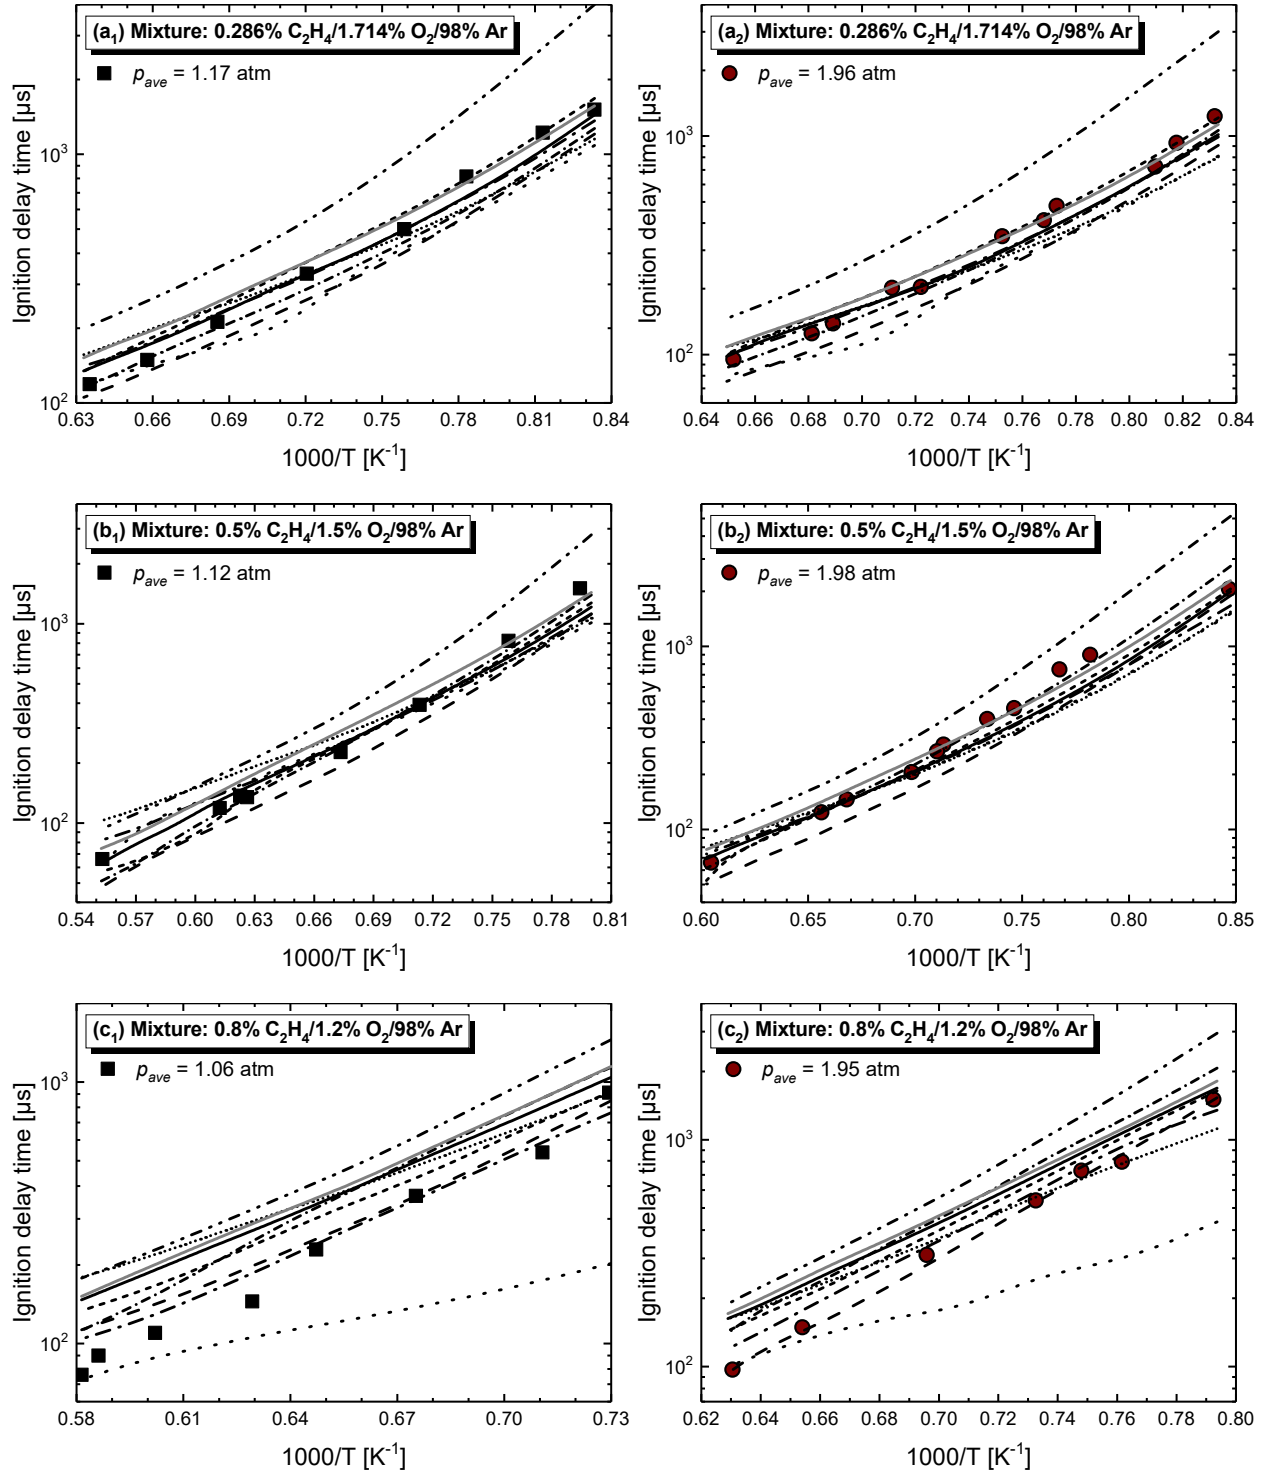

Figure S11: Shock tube ignition delay times for ethylene mixtures. Symbols represent experimental data; lines denote model predictions with the selected mechanisms.

1.1.12 Xiong et al. experimental data[12]

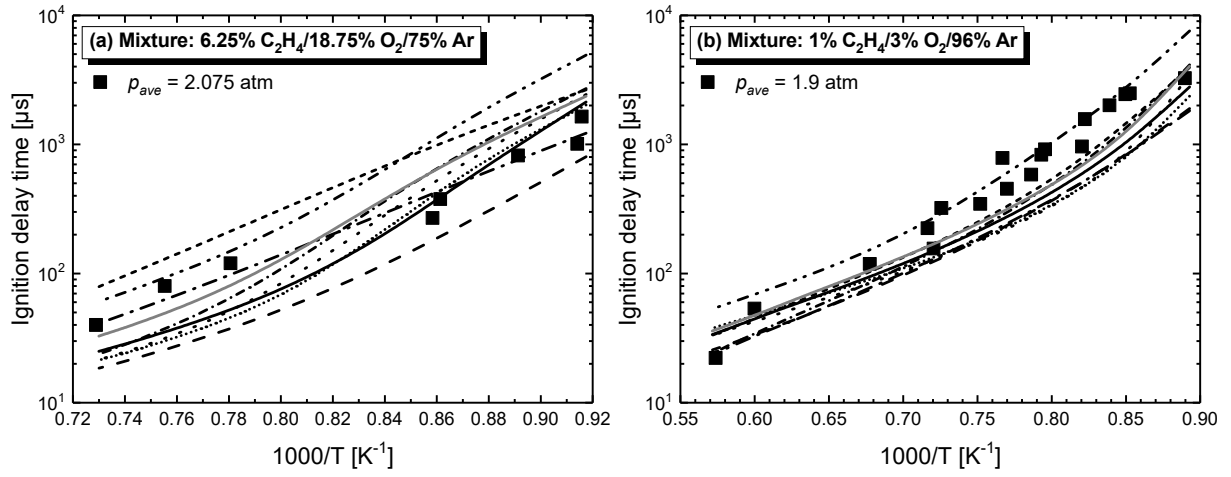

Figure S12: Shock tube ignition delay times for ethylene mixtures. Symbols represent experimental data; lines denote model predictions with the selected mechanisms.

1.1.13 Shao et al. experimental data[13]

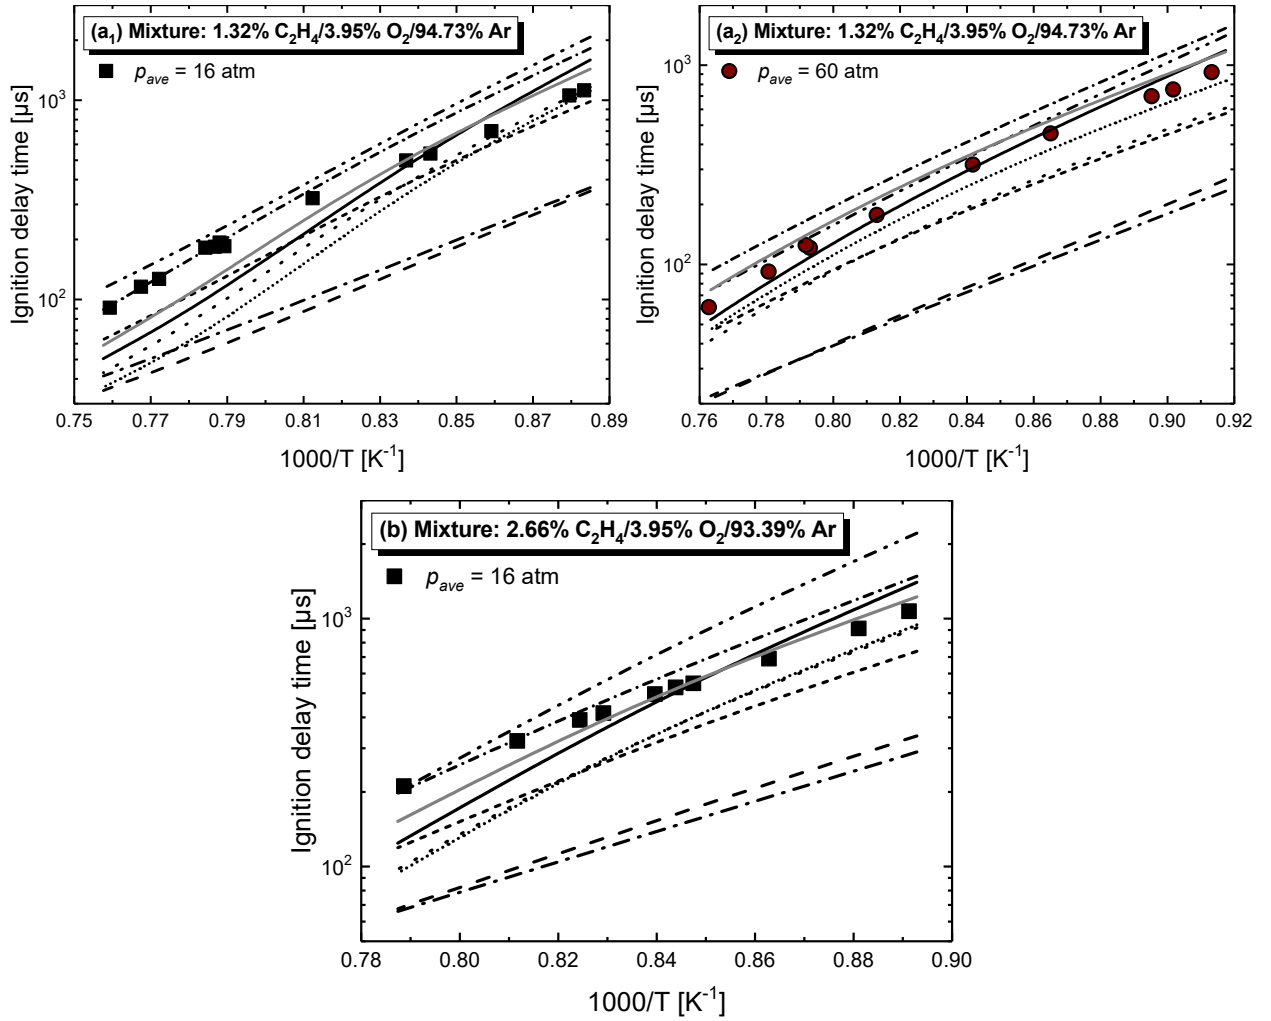

Figure S13: Shock tube ignition delay times for ethylene mixtures. Symbols represent experimental data; lines denote model predictions with the selected mechanisms.

1.1.14 Baigmohammadi *et al.* experimental data[14]

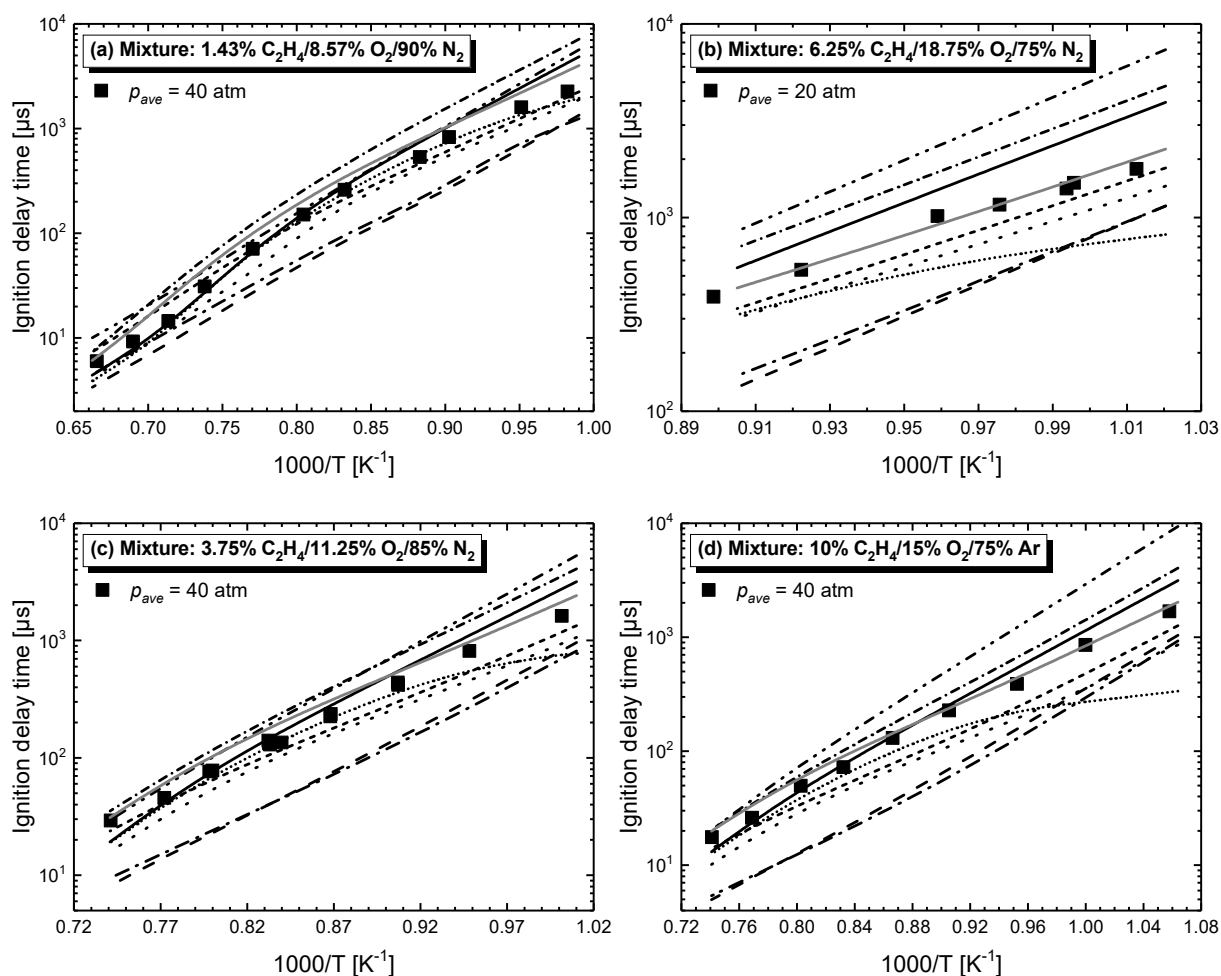

Figure S14: Shock tube ignition delay times for ethylene mixtures. Symbols represent experimental data; lines denote model predictions with the selected mechanisms.



1.1.15 Yang et al. experimental data[15]

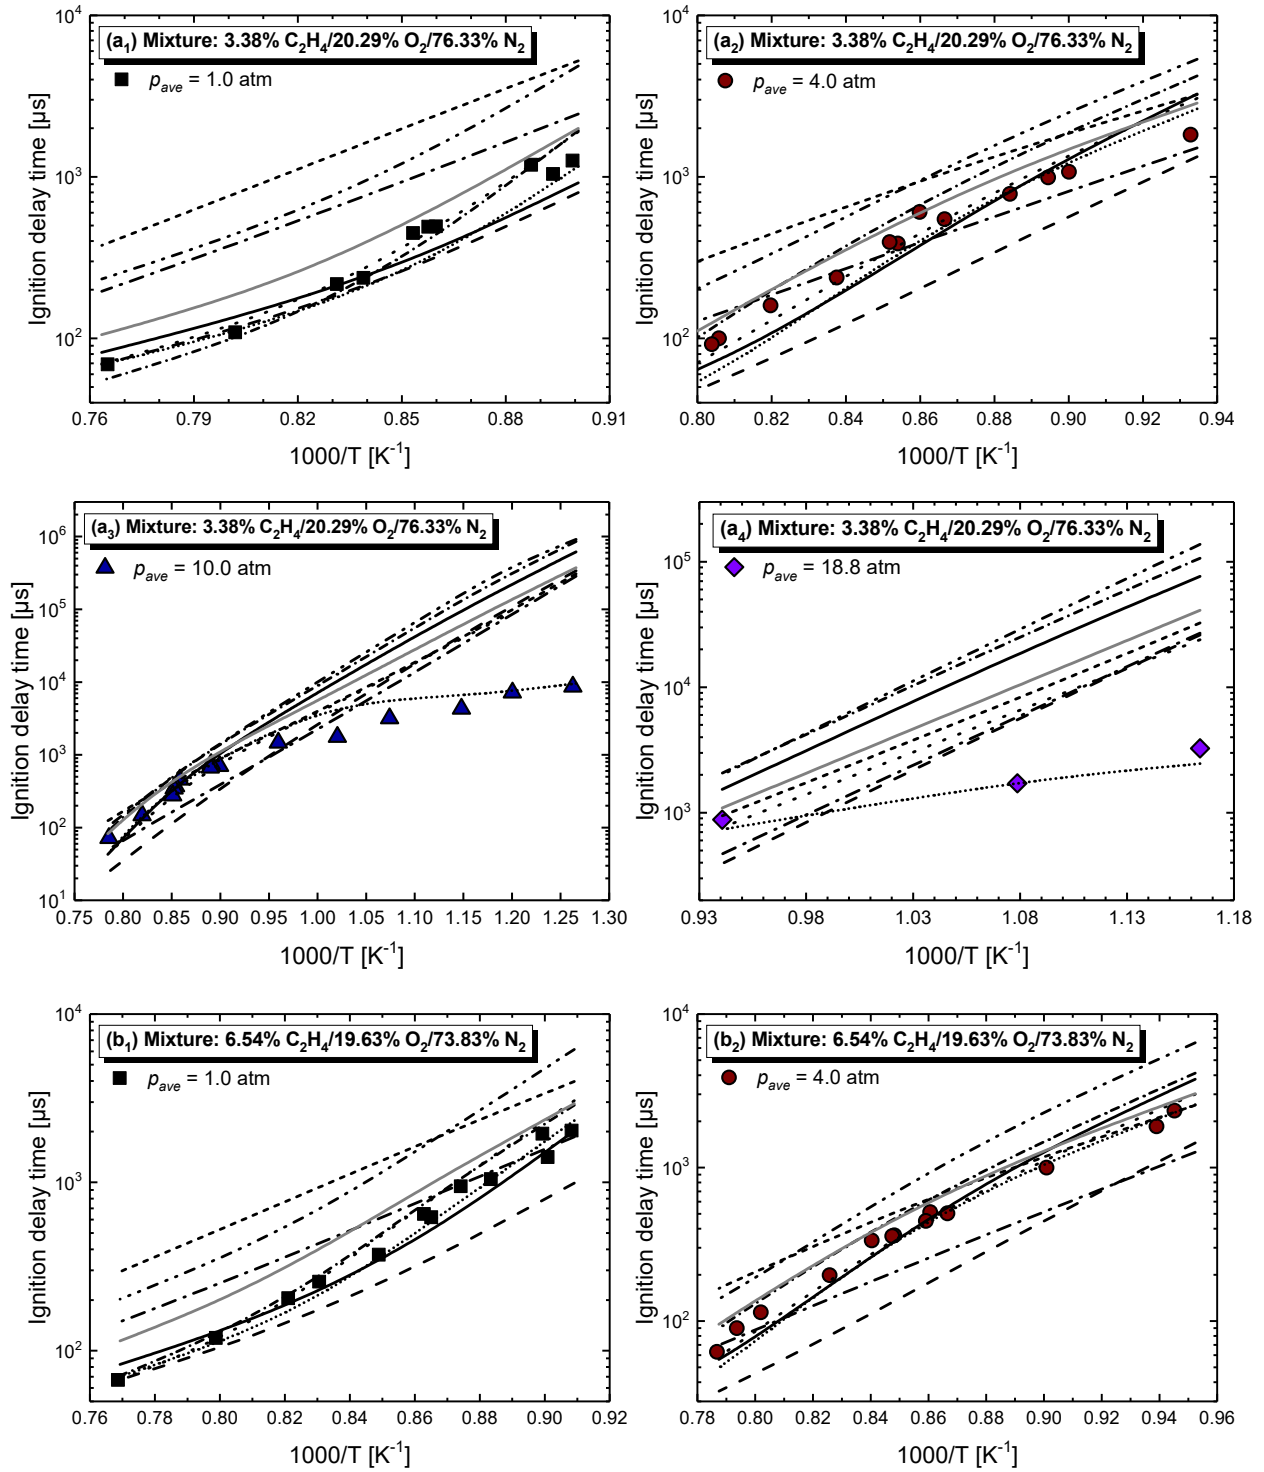

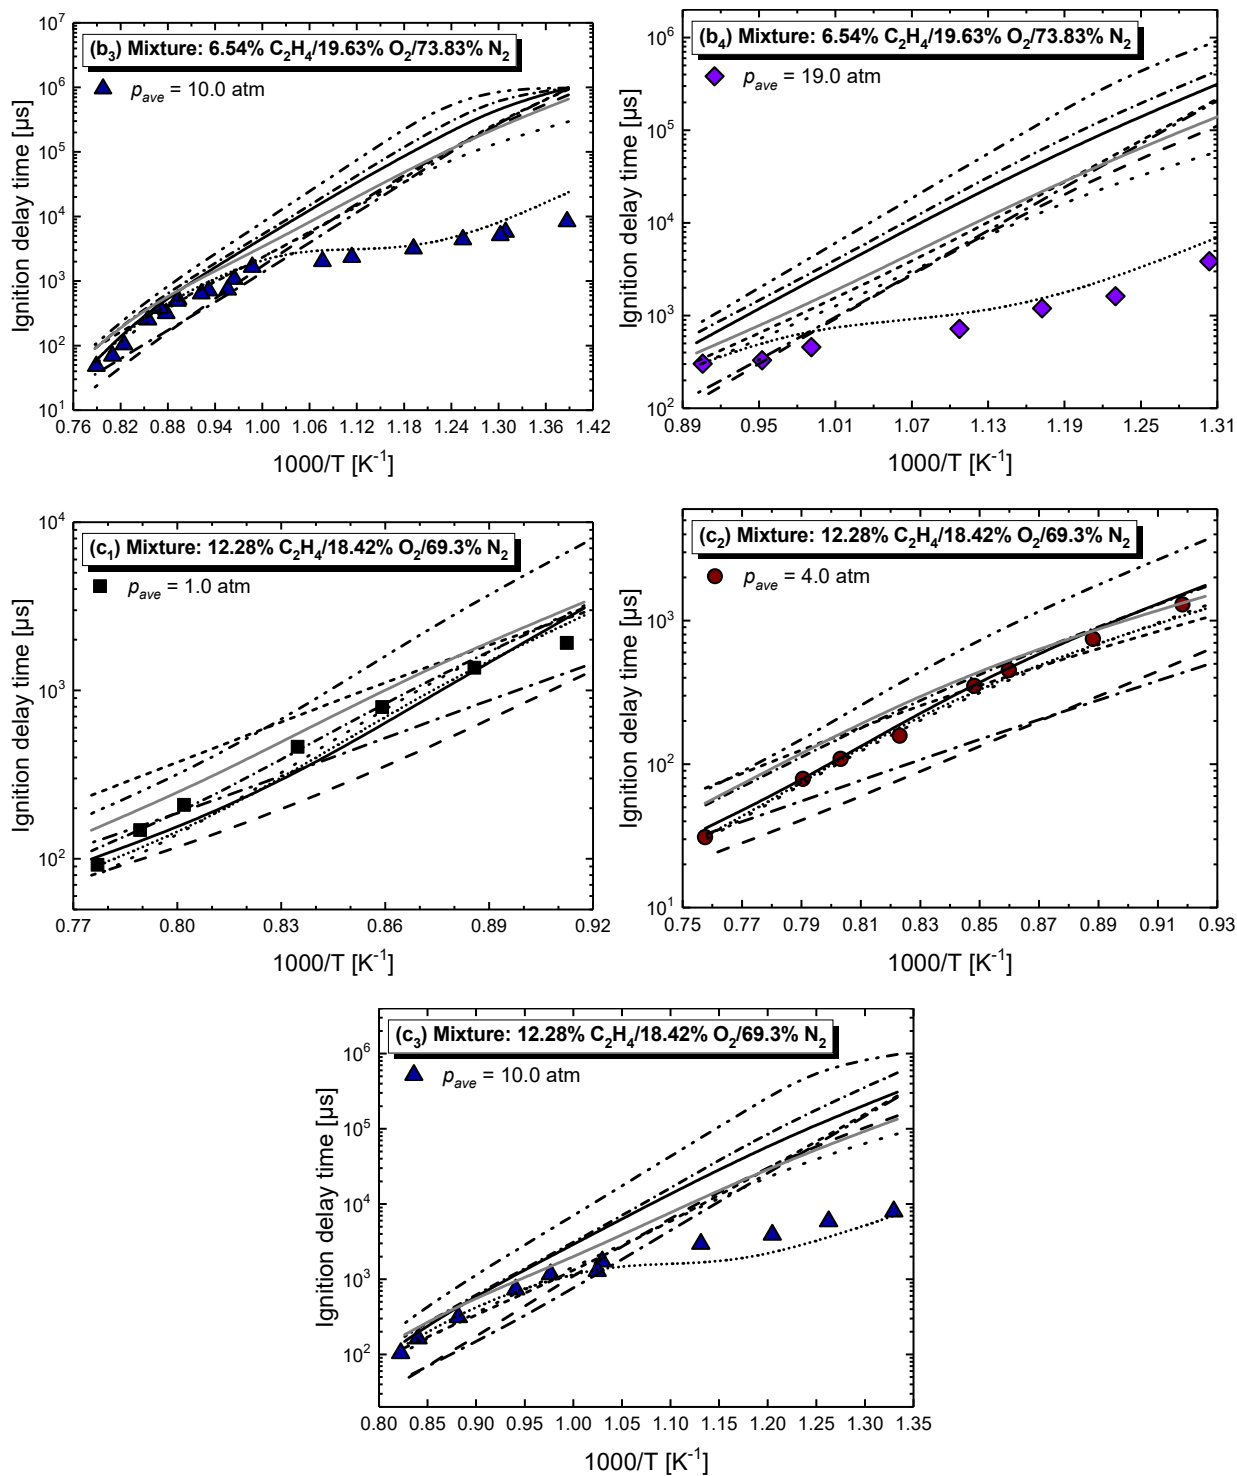

Figure S15: Shock tube ignition delay times for ethylene mixtures. Symbols represent experimental data; lines denote model predictions with the selected mechanisms.

1.1.16 Xiong et al. experimental data[16]

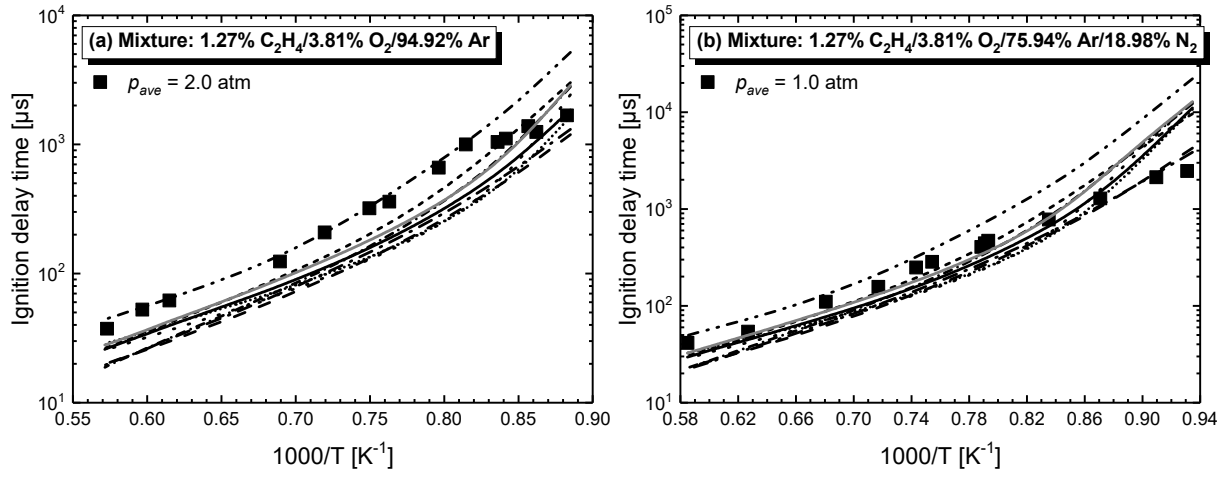

Figure S16: Shock tube ignition delay times for ethylene mixtures. Symbols represent experimental data; lines denote model predictions with the selected mechanisms.

1.1.17 Dong et al. experimental data[17]

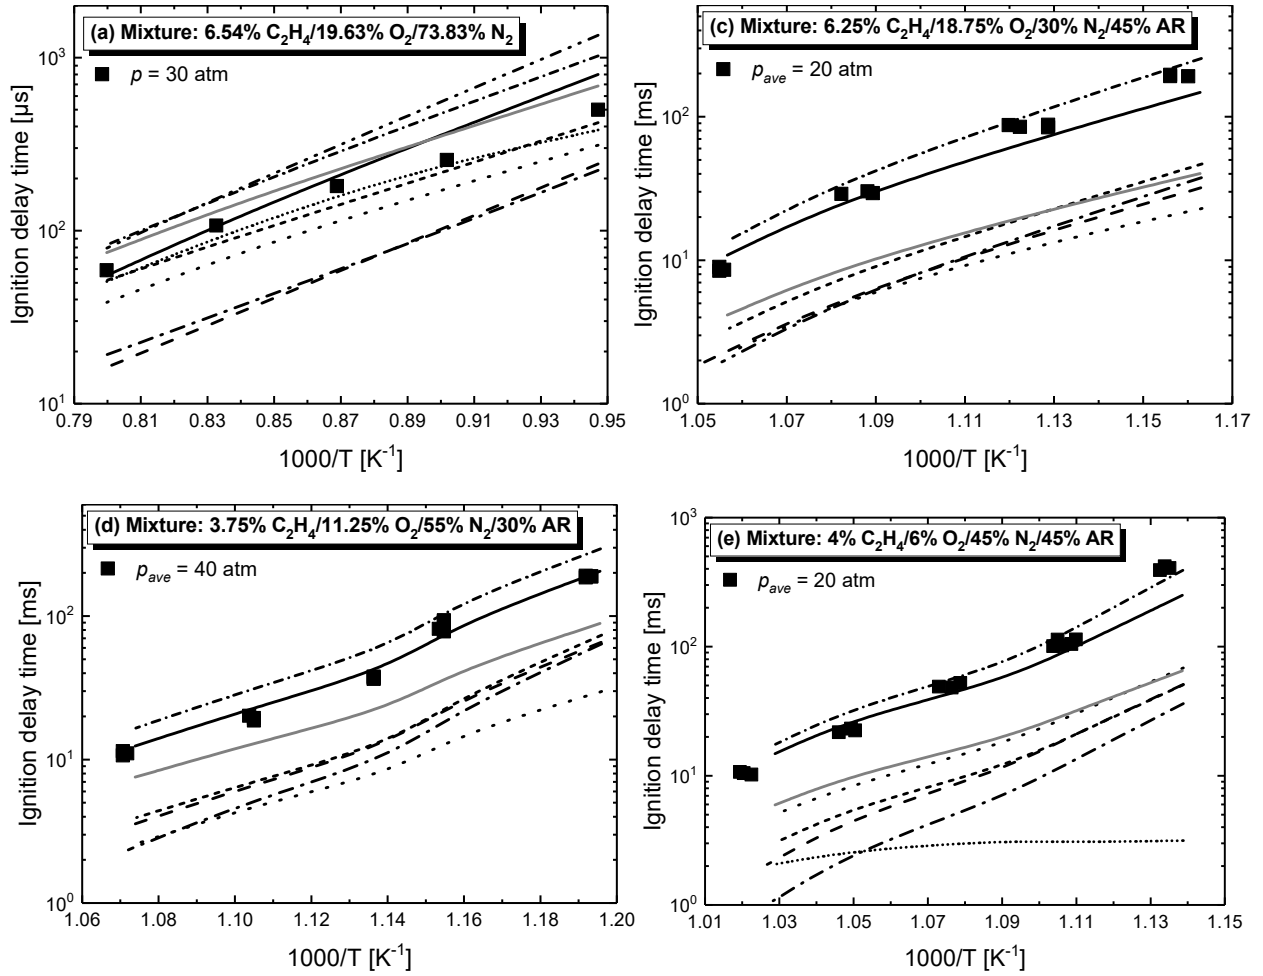

Figure S17: Shock tube ignition delay times for ethylene mixtures. Symbols represent experimental data; lines denote model predictions with the selected mechanisms.

## 1.2 Rapid compress machine ignition delay times of ethylene

### 1.2.1 Baigmohammadi et al. experimental data[14]

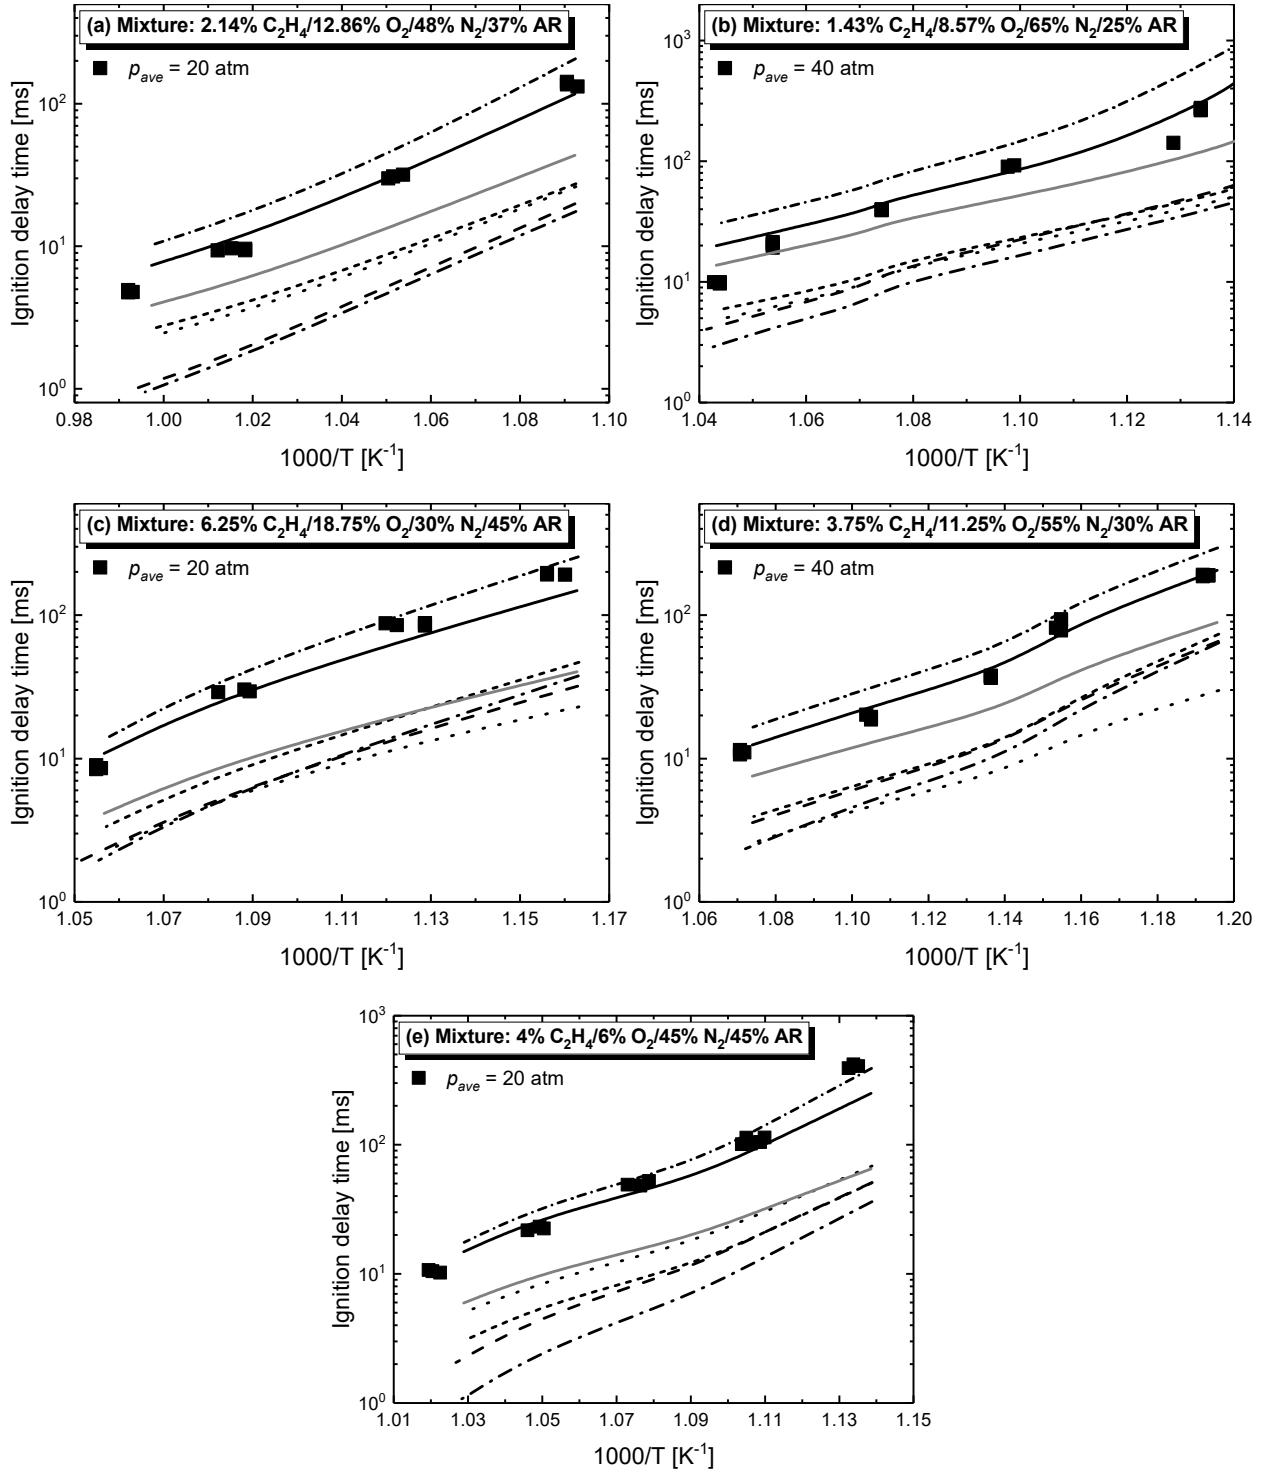

Figure S18: Rapid compress machine ignition delay times for ethylene mixtures. Symbols represent experimental data; lines denote model predictions with the selected mechanisms.

1.2.2 Dong et al. experimental data[17]

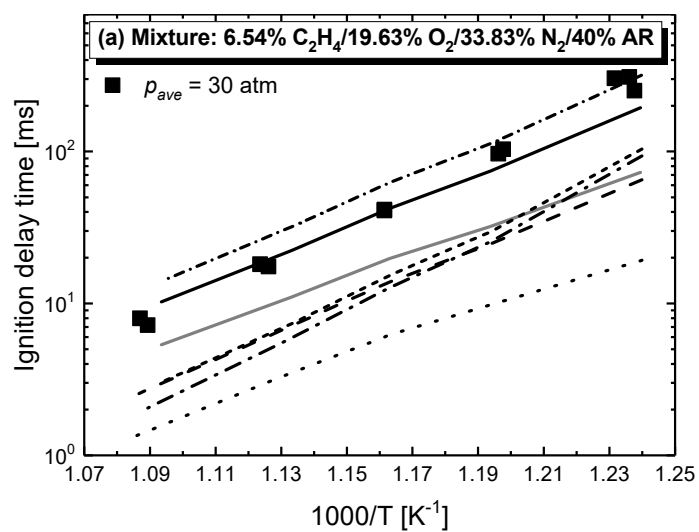

Figure S19: Rapid compress machine ignition delay times for ethylene mixtures. Symbols represent experimental data; lines denote model predictions with the selected mechanisms.

## 2. Mechanism performance for propene

### 2.1 Shock tube ignition delay times of ethylene

#### 2.1.1 Burcat and Radhakrishnan experimental data[18]

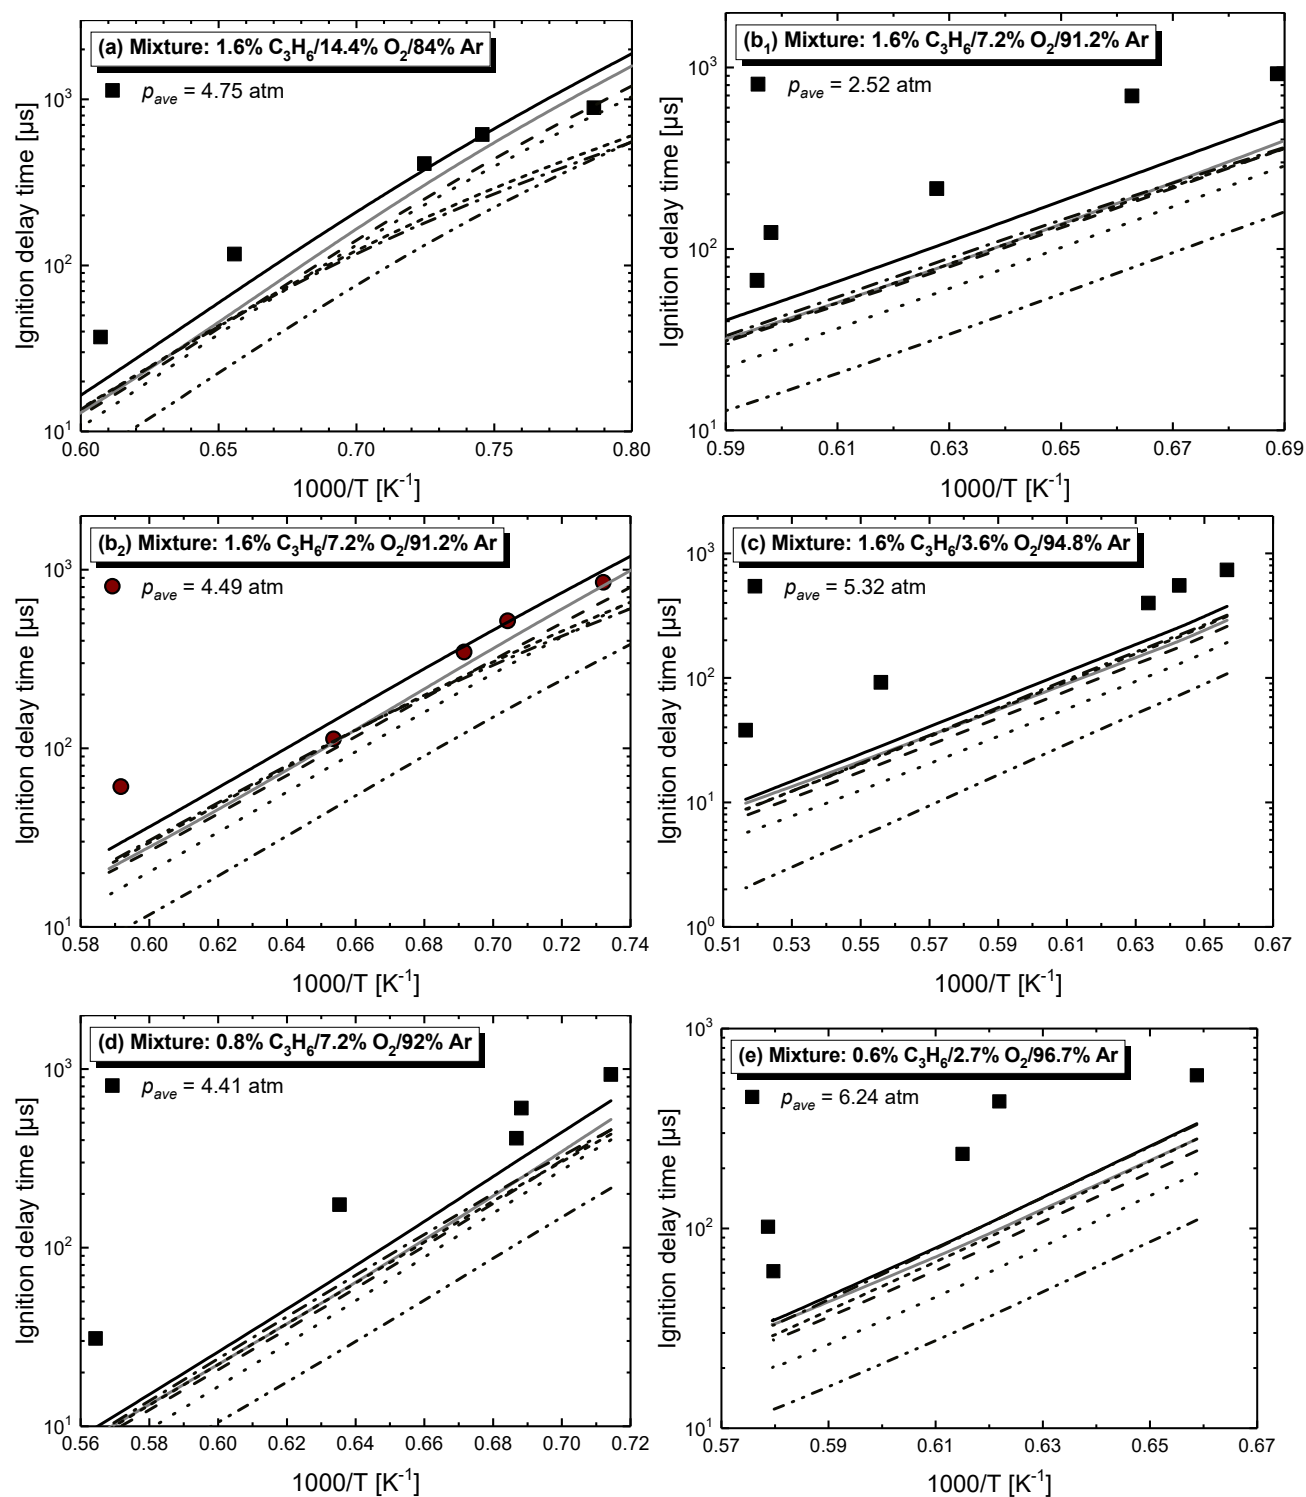

Figure S20: Shock tube ignition delay times for propene mixtures. Symbols represent experimental data; lines denote model predictions with the selected mechanisms.

### 2.1.2 Qin et al. experimental data[19]

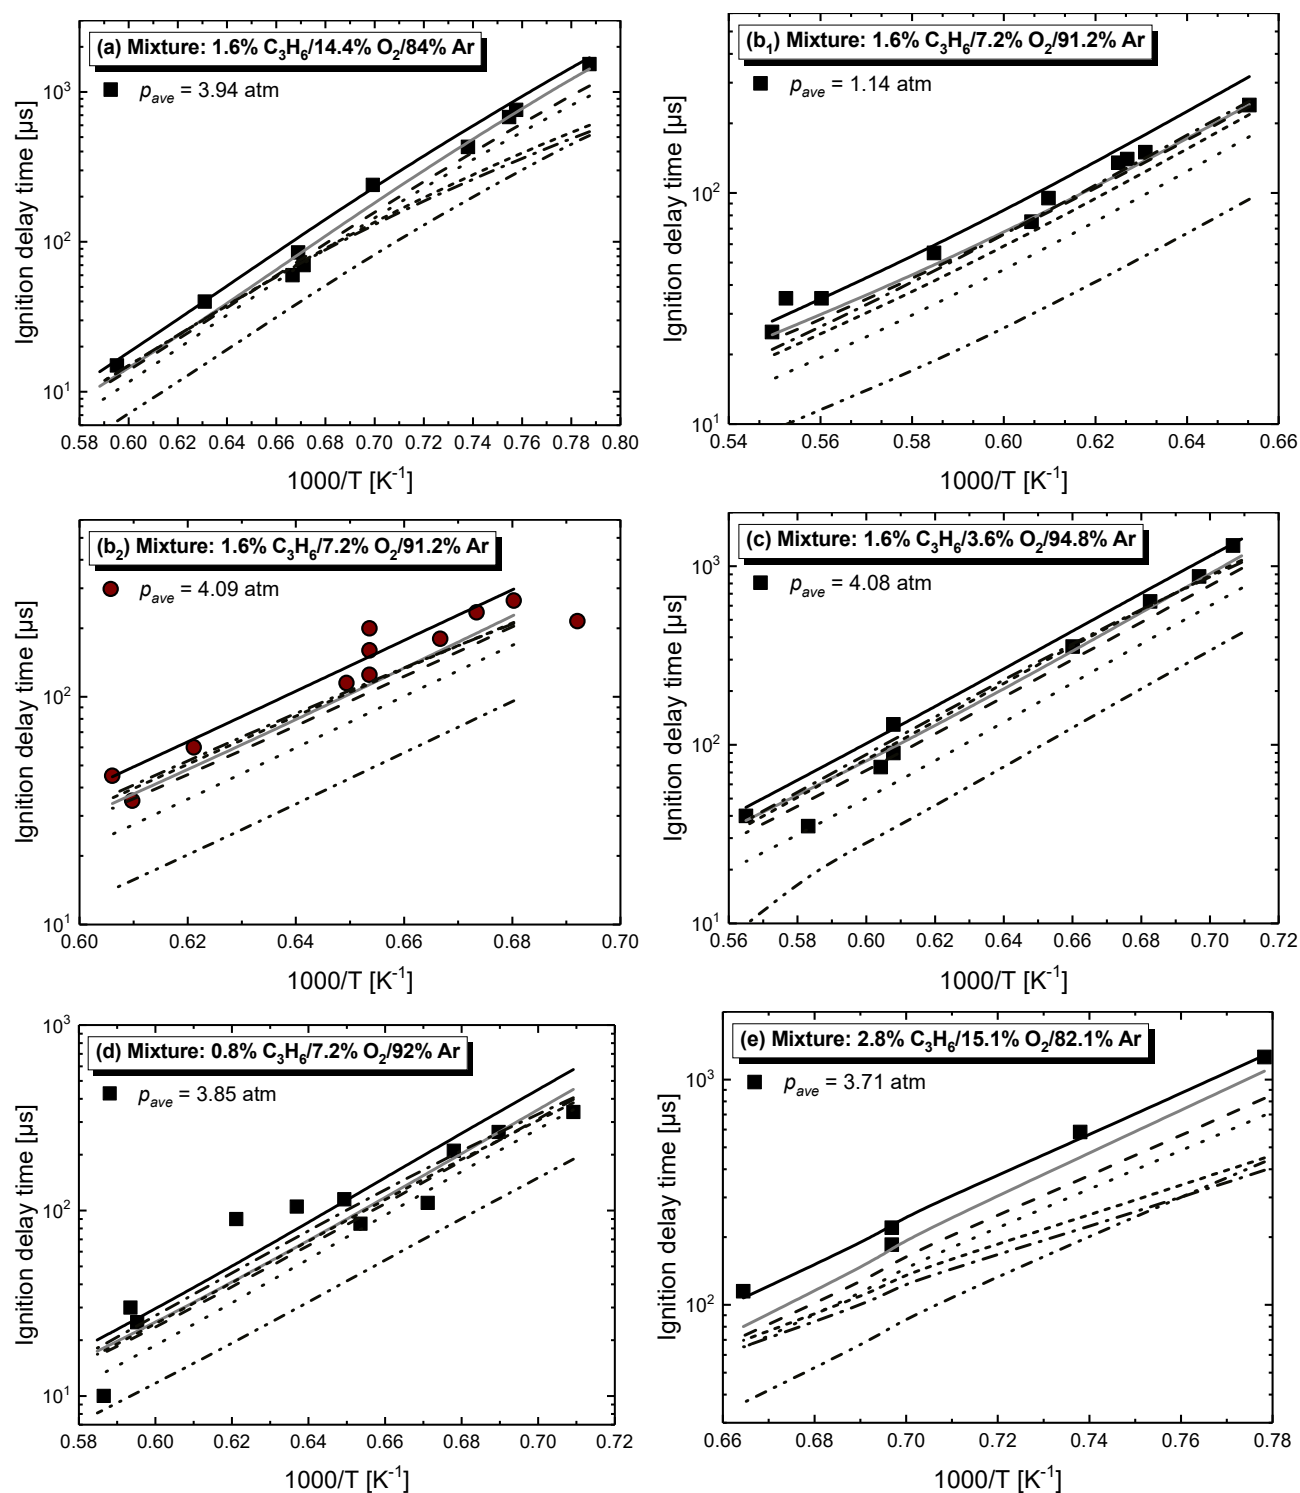

Figure S21: Shock tube ignition delay times for propene mixtures. Symbols represent experimental data; lines denote model predictions with the selected mechanisms.

### 2.1.3 Burke et al. experimental data[20]

#### (1) Fuel in diluent

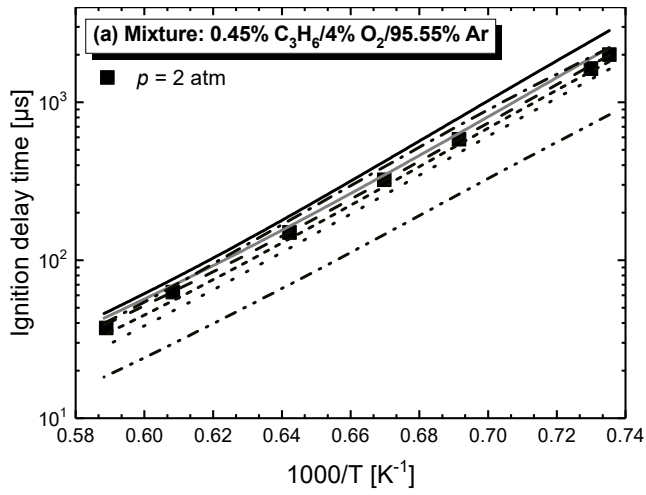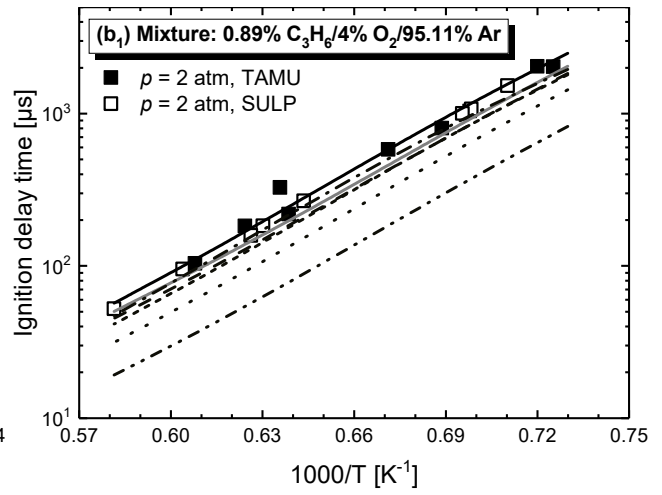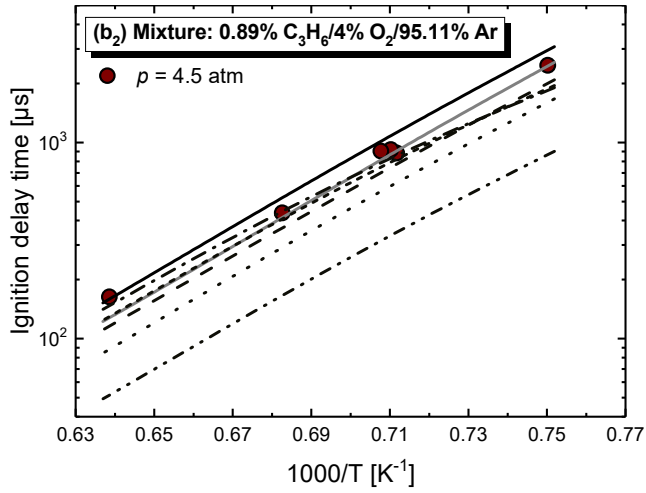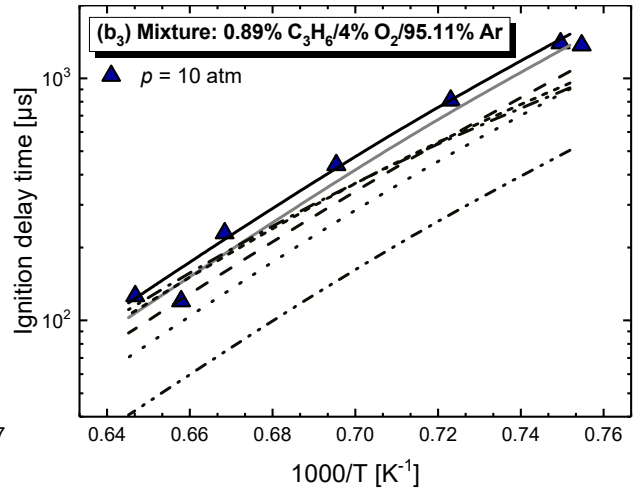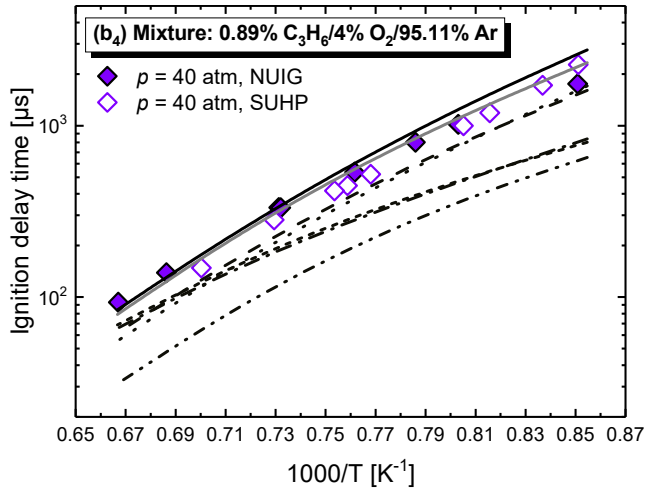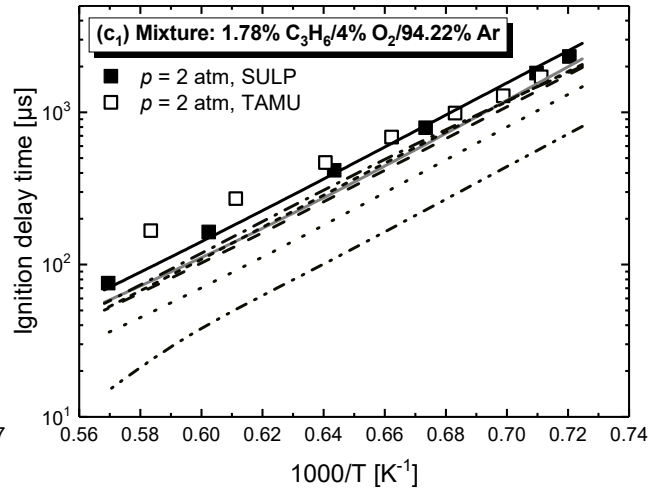



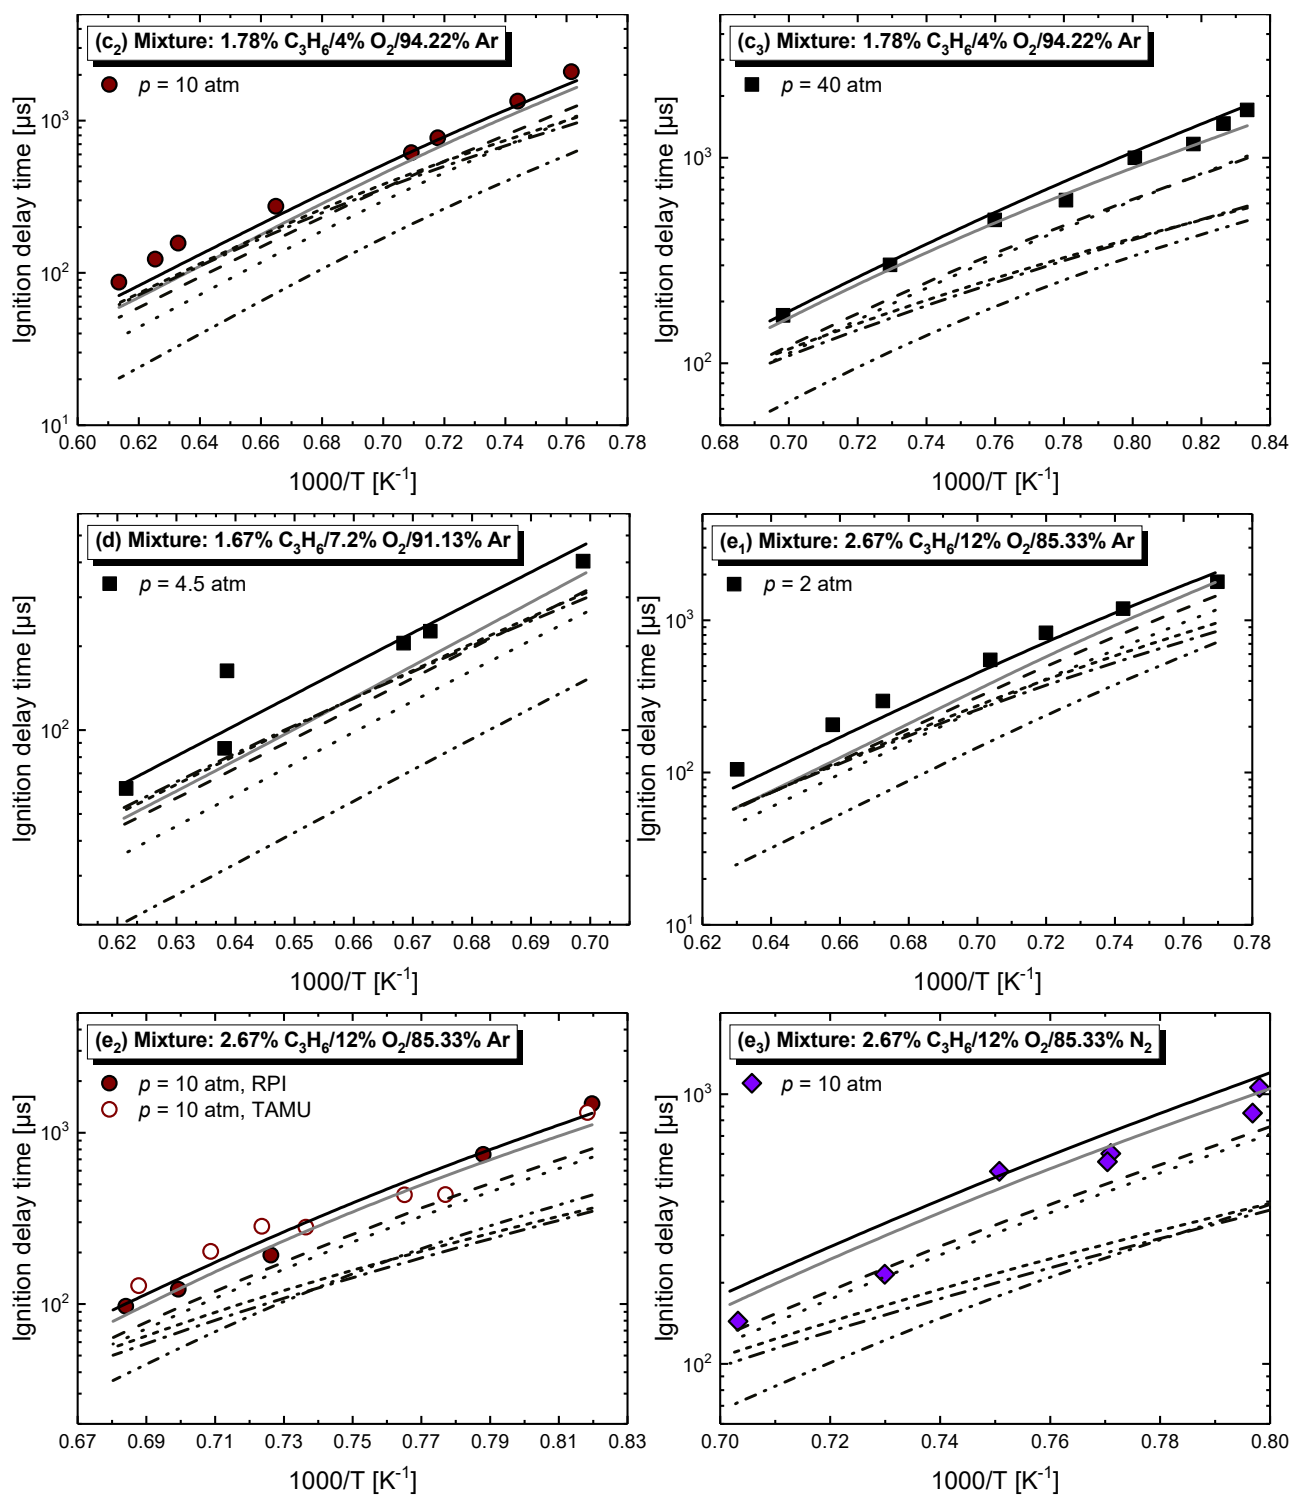

Figure S22: Shock tube ignition delay times for propene mixtures. Symbols represent experimental data; lines denote model predictions with the selected mechanisms.

(2) Fuel in air

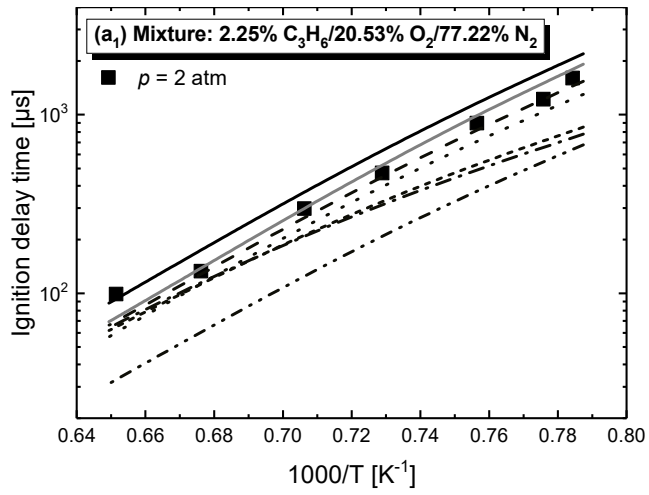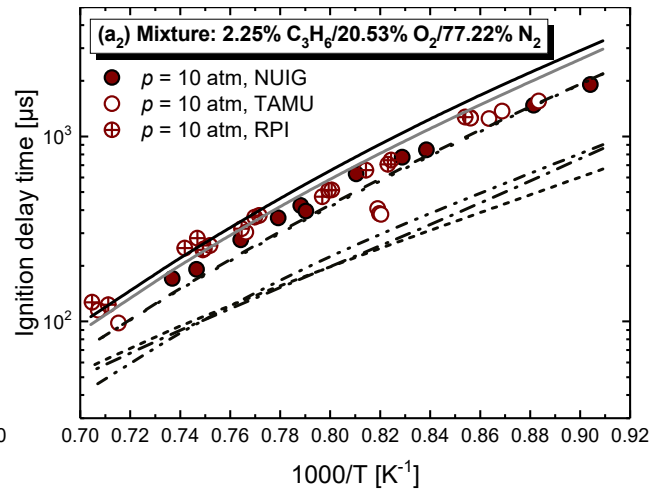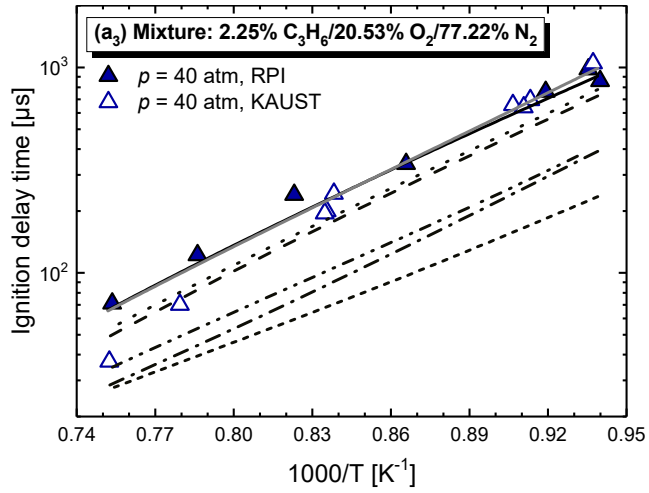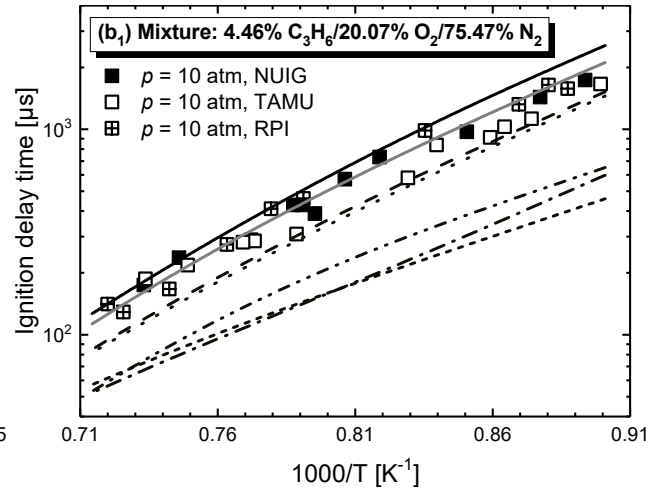

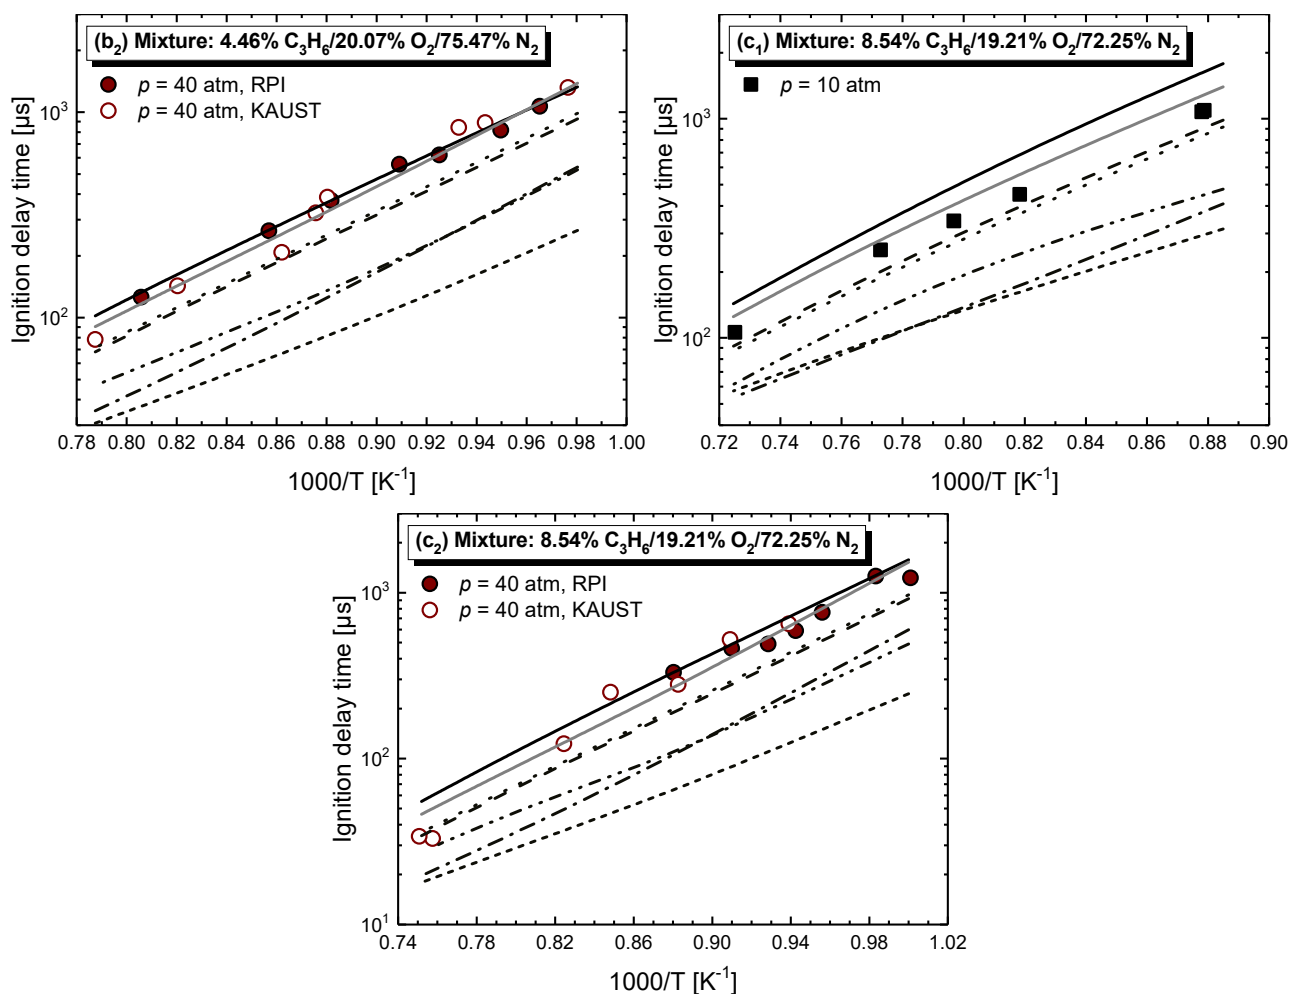

Figure S23: Shock tube ignition delay times for propene mixtures. Symbols represent experimental data; lines denote model predictions with the selected mechanisms.

#### 2.1.4 Shao et al. experimental data[13]

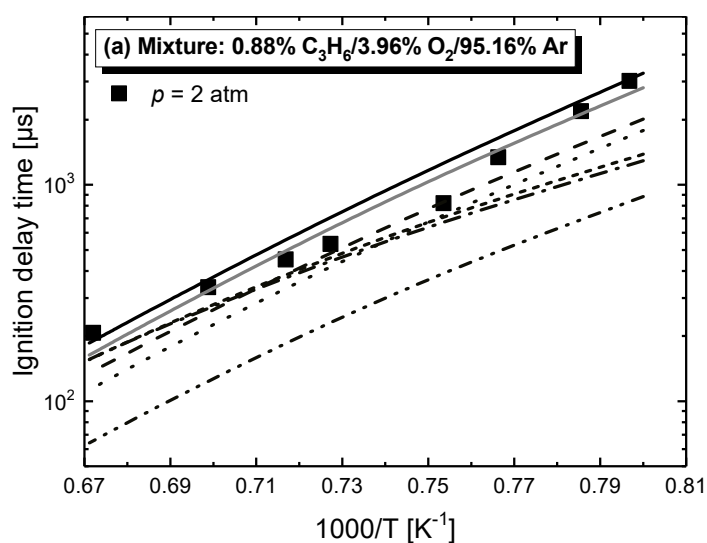

Figure S24: Shock tube ignition delay times for propene mixtures. Symbols represent experimental data; lines denote model predictions with the selected mechanisms.

### 3. Mechanism performance for 1-butene

#### 3.1 Shock tube ignition delay times of 1-butene

##### 3.1.1 Heyberger et al. experimental data[21]

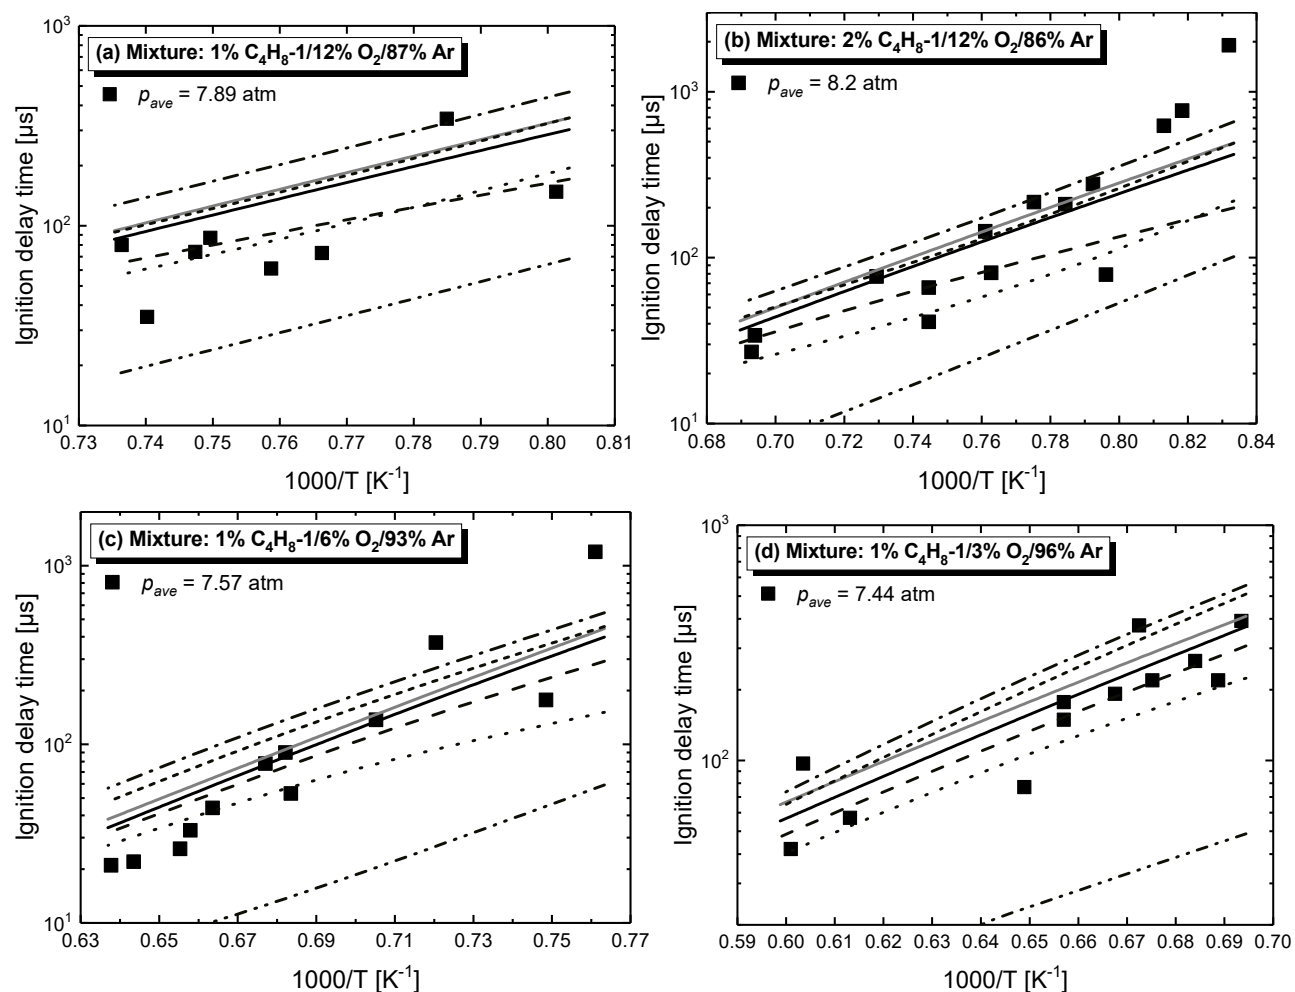

Figure S25: Shock tube ignition delay times for 1-butene mixtures. Symbols represent experimental data; lines denote model predictions with the selected mechanisms.

### 3.1.2 Pan et al. experimental data[22]

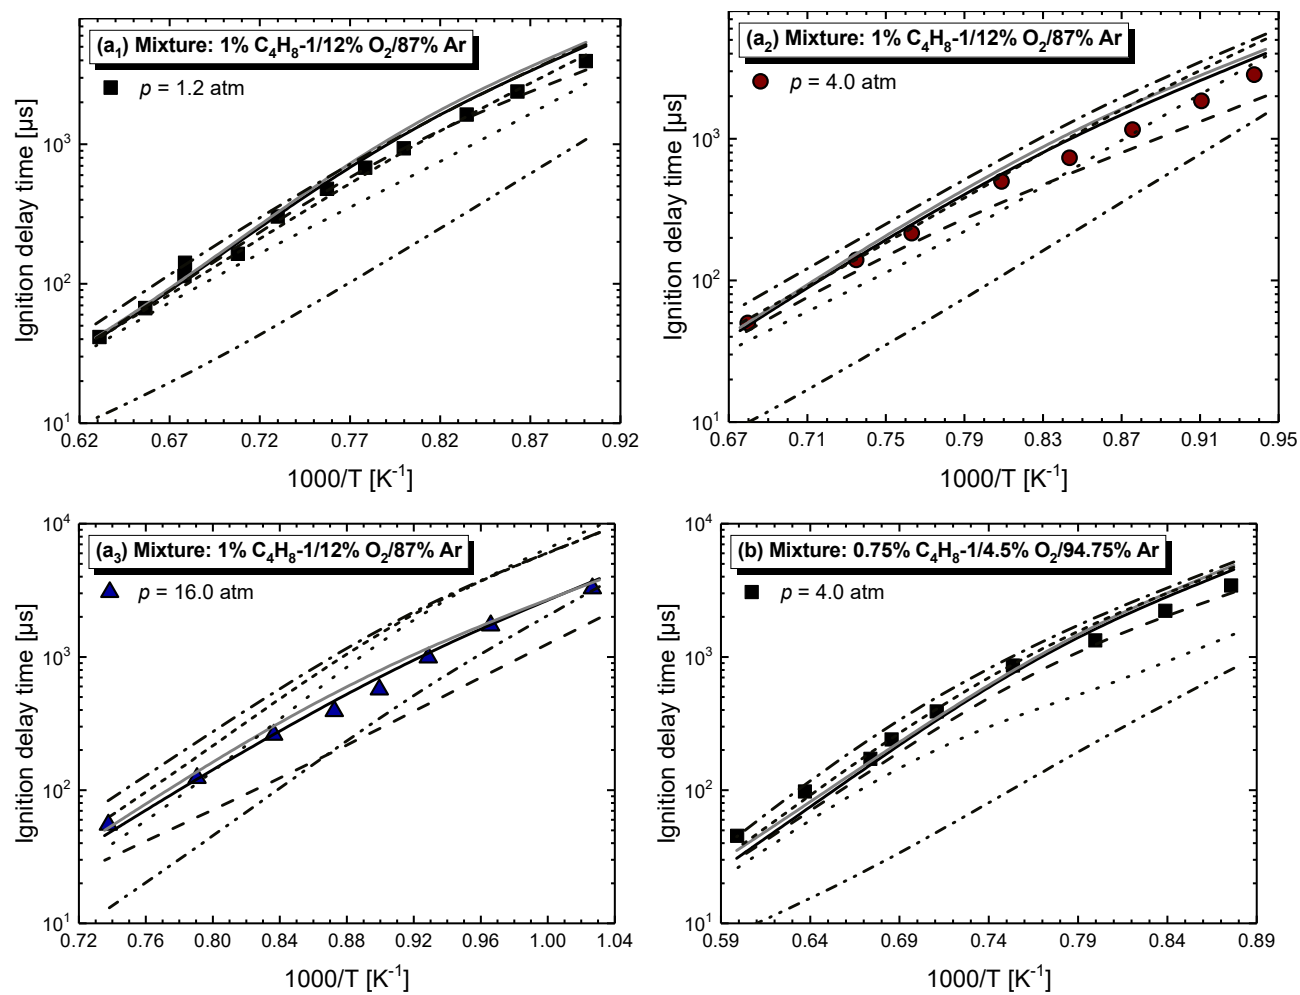

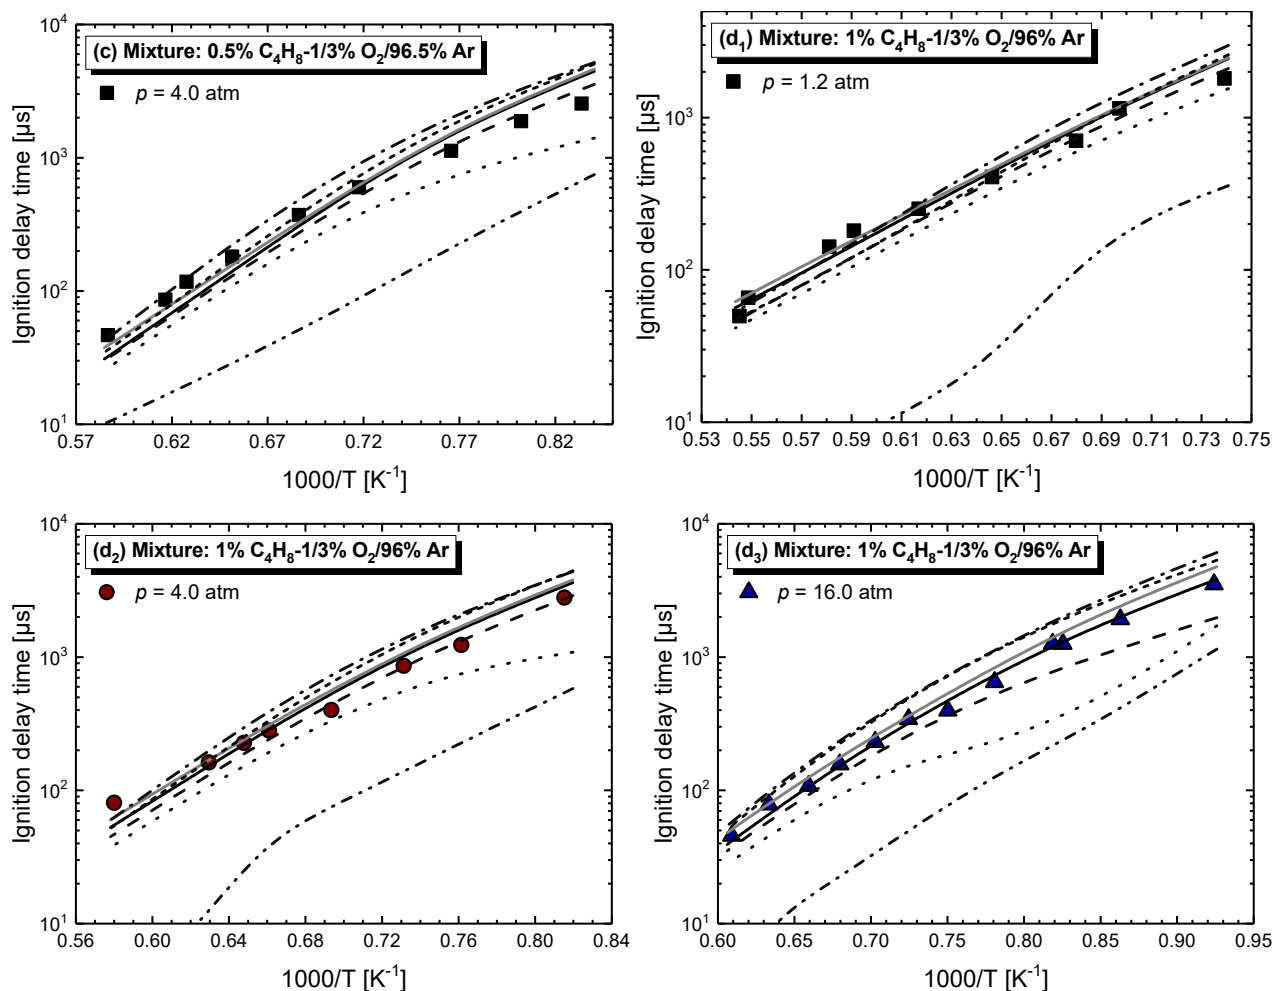

Figure S26: Shock tube ignition delay times for 1-butene mixtures. Symbols represent experimental data; lines denote model predictions with the selected mechanisms.

### 3.1.3 Li et al. experimental data[23]

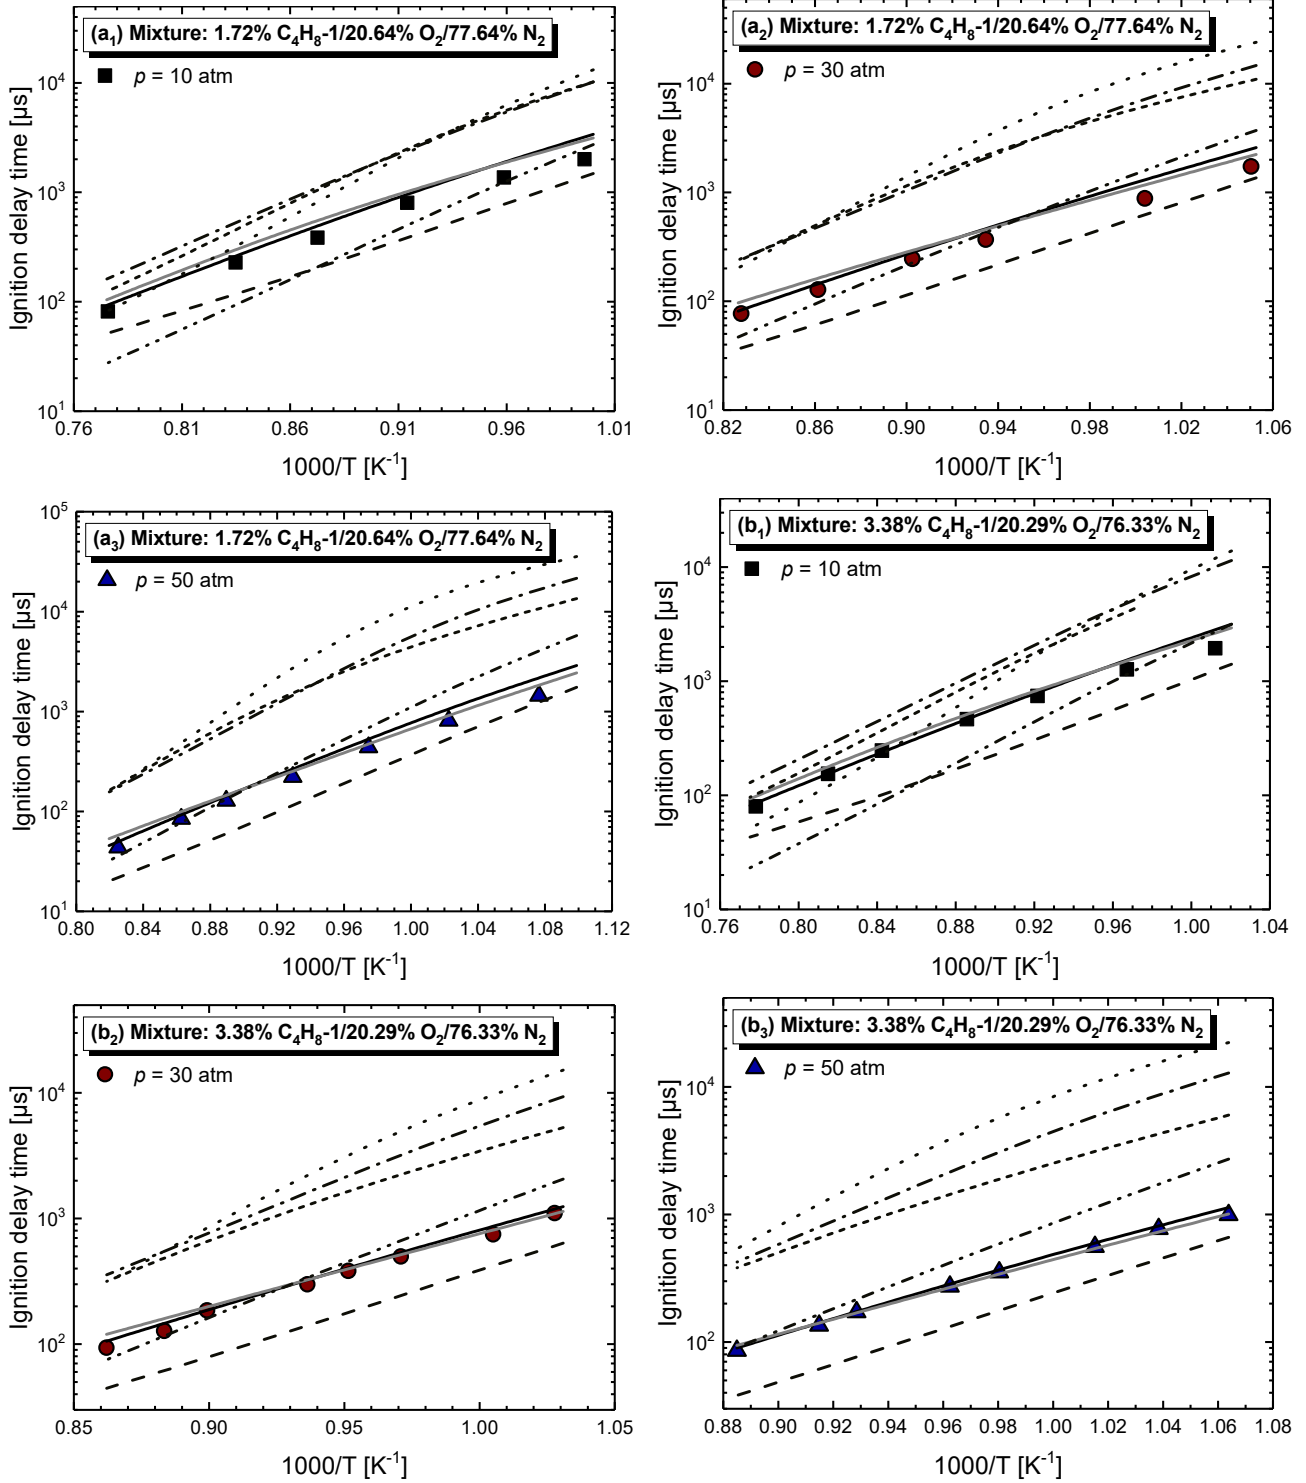

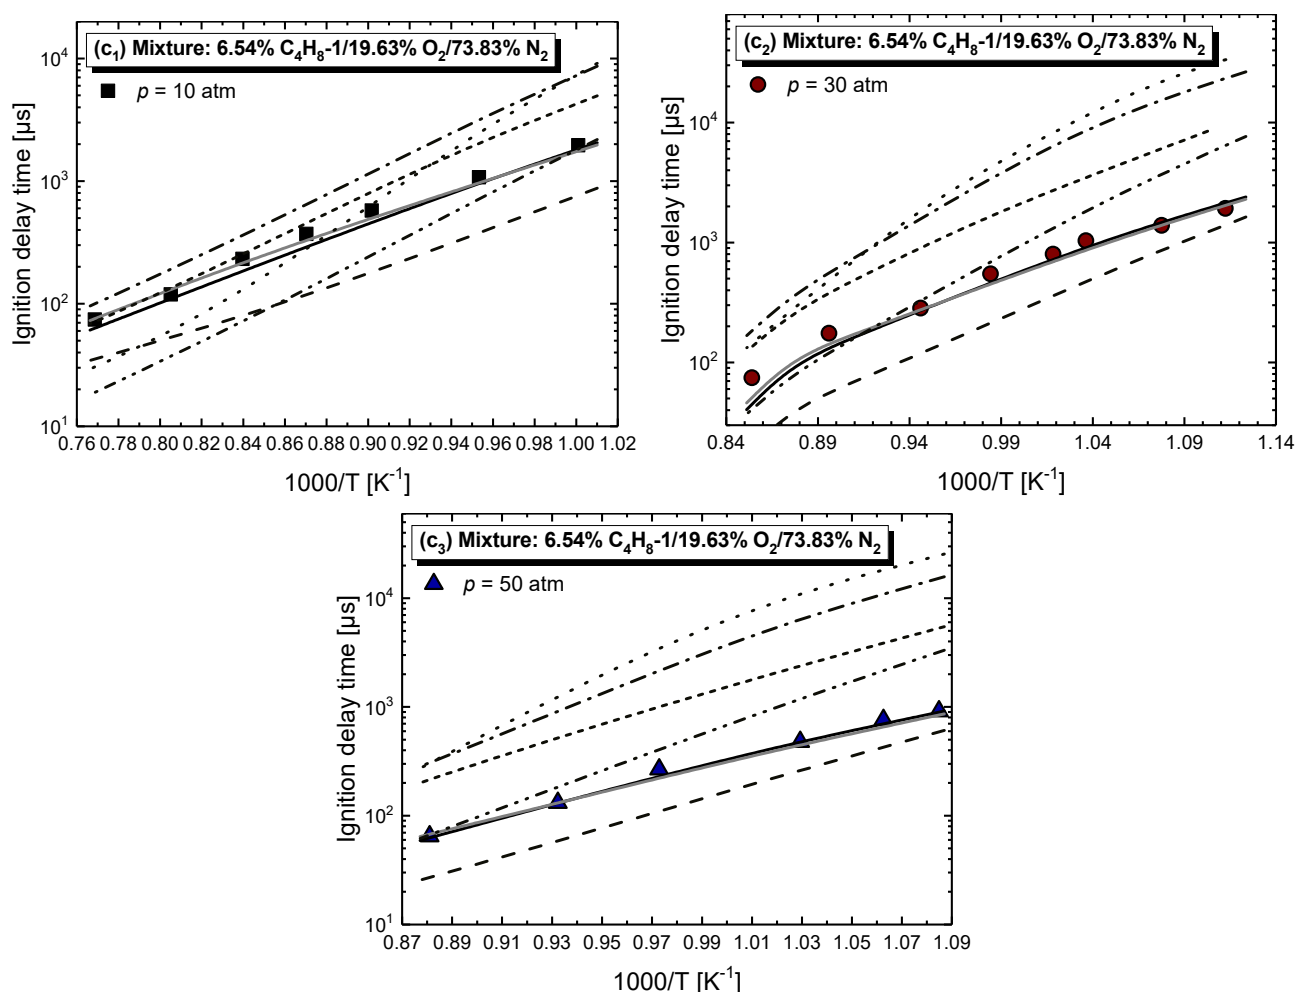

Figure S27: Shock tube ignition delay times for 1-butene mixtures. Symbols represent experimental data; lines denote model predictions with the selected mechanisms.

#### References

1. Yoshiaki, H., K. Tsuyoshi, and S. Masao, *A Shock-tube Investigation of Ignition in Ethylene–Oxygen–Argon Mixtures*. Bulletin of the Chemical Society of Japan, 1974. **47**(9): p. 2166-2170.
2. Brown, C.J. and G.O. Thomas, *Experimental studies of shock-induced ignition and transition to detonation in ethylene and propane mixtures*. Combustion and Flame, 1999. **117**(4): p. 861-870.
3. III, M.B.C. and L.J. Spadaccini, *Scramjet Fuels Autoignition Study*. Journal of Propulsion and Power, 2001. **17**(2): p. 315-323.
4. Horning, D.C., *A Study of The Hige-temperature Autoignition And Thermal Decomposition of Hydrocarbons*. 2001.
5. Kalitan, D.M., J.M. Hall, and E.L. Petersen, *Ignition and Oxidation of Ethylene-Oxygen-Diluent Mixtures with and Without Silane*. Journal of Propulsion and Power, 2005. **21**(6): p. 1045-1056.
6. Penyazkov, O.G., et al., *High-pressure ethylene oxidation behind reflected shock waves*. Proceedings of the Combustion Institute, 2009. **32**(2): p. 2421-2428.



7. Tereza, A.M., V.G. Slutski, and E.S. Severin, *Autoignition of ethylene in shock waves*. Russian Journal of Physical Chemistry B, 2010. **4**(3): p. 475-485.
8. Saxena, S., M.S.P. Kahandawala, and S.S. Sidhu, *A shock tube study of ignition delay in the combustion of ethylene*. Combustion and Flame, 2011. **158**(6): p. 1019-1031.
9. Davidson, D., W. Ren, and R. Hanson, *Experimental Database for Development of a HiFiRE JP-7 Surrogate Fuel Mechanism*, in *50th AIAA Aerospace Sciences Meeting including the New Horizons Forum and Aerospace Exposition*. 2012, American Institute of Aeronautics and Astronautics.
10. Kopp, M.M., et al., *Oxidation of Ethylene–Air Mixtures at Elevated Pressures, Part 1: Experimental Results*. Journal of Propulsion and Power, 2014. **30**(3): p. 790-798.
11. Mathieu, O., et al., *Experimental study of the effect of CF<sub>3</sub>I addition on the ignition delay time and laminar flame speed of methane, ethylene, and propane*. Proceedings of the Combustion Institute, 2015. **35**(3): p. 2731-2739.
12. Xiao-He XIONG, Y.-J.D., Xiao-Bo CAO, Zhi-Min PENG, Yong-Hua LI, *Ethylene Oxidation Experimental Study and Kinetic Mechanism Analysis Based on Shock Tube*. Acta Phys. -Chim. Sin., 2016. **32**(6): p. 1416-1423.
13. Shao, J., D.F. Davidson, and R.K. Hanson, *A shock tube study of ignition delay times in diluted methane, ethylene, propene and their blends at elevated pressures*. Fuel, 2018. **225**: p. 370-380.
14. Baigmohammadi, M., et al., *A Comprehensive Experimental and Simulation Study of Ignition Delay Time Characteristics of Single Fuel C<sub>1</sub>–C<sub>2</sub> Hydrocarbons over a Wide Range of Temperatures, Pressures, Equivalence Ratios, and Dilutions*. Energy & Fuels, 2020. **34**(3): p. 3755-3771.
15. Yang, M., et al., *An experimental and modeling study of ethylene–air combustion over a wide temperature range*. Combustion and Flame, 2020. **221**: p. 20-40.
16. Xiong, X., et al., *Shock tube evaluation on C<sub>2</sub>H<sub>4</sub> ignition delay differences among N<sub>2</sub>, Ar, He, CO<sub>2</sub> diluent gases*. Journal of the Energy Institute, 2020. **93**(4): p. 1271-1277.
17. Dong, S., et al., *A comparative reactivity study of 1-alkene fuels from ethylene to 1-heptene*. Proceedings of the Combustion Institute, 2020.
18. Burcat, A. and K. Radhakrishnan, *High temperature oxidation of propene*. Combustion and Flame, 1985. **60**(2): p. 157-169.
19. Qin, Z., H. Yang, and W.C. Gardiner, *Measurement and modeling of shock-tube ignition delay for propene*. Combustion and Flame, 2001. **124**(1): p. 246-254.
20. Burke, S.M., et al., *An experimental and modeling study of propene oxidation. Part 2: Ignition delay time and flame speed measurements*. Combustion and Flame, 2015. **162**(2): p. 296-314.
21. Heyberger, B., et al., *Oxidation of small alkenes at high temperature*. International Journal of Chemical Kinetics, 2002. **34**(12): p. 666-677.
22. Pan, L., et al., *A high pressure shock tube study of 1-butene oxidation and its comparison with n-butane and alkenes*. Fuel, 2015. **157**: p. 21-27.
23. Li, Y., C.-W. Zhou, and H.J. Curran, *An extensive experimental and modeling study of 1-butene oxidation*. Combustion and Flame, 2017. **181**: p. 198-213.
